# Supplementary material for: Scaling up molecular pattern recognition with DNA-based winner-take-all neural networks
Source: Springer Nature journal article supplement (doi:10.1038/s41586-018-0289-6), 2018-07-01
Supplement: MOESM8 [file 41586_2018_289_MOESM8_ESM.xlsx]

## Sheet: Extended Data Fig 4
1. y1 (fluorophore: ATTO590)
Time (minutes)	sample 1	sample 2	sample 3	sample 4	sample 5	sample 6	sample 7	sample 8	sample 9	sample 10	sample 11	sample 12	sample 13	sample 14	sample 15	sample 16	sample 17	sample 18	sample 19	sample 20	sample 21	sample 22	sample 23	sample 24	sample 25	sample 26	sample 27	sample 28	sample 29	sample 30
0	323	331	292	330	348	345	382	341	347	336	323	354	219	238	280	218	237	258	229	238	243	232	267	237	223	248	255	270	240	244
2	391	383	365	387	377	372	391	403	363	366	358	370	271	270	336	230	251	285	247	270	287	228	263	277	243	285	289	268	231	251
4	460	435	471	471	417	405	541	498	437	444	415	370	347	370	414	220	285	337	264	324	360	247	265	293	262	330	369	253	268	327
6	617	464	647	596	444	439	656	607	532	519	466	432	415	484	539	224	325	381	310	423	495	232	267	334	309	403	444	261	308	354
8	808	487	779	743	490	457	804	752	656	602	531	446	508	583	666	224	352	431	372	531	650	238	287	357	363	485	571	286	351	428
10	902	540	941	873	549	456	956	932	783	646	604	476	616	702	811	224	391	487	413	666	733	245	266	370	399	574	660	276	381	481
12	1021	623	1093	1031	614	458	1117	979	905	763	670	507	731	814	946	227	402	565	480	785	919	248	272	400	484	642	757	281	438	558
14	1195	662	1241	1194	649	512	1186	1101	1015	780	644	540	867	907	1043	222	415	588	508	851	1003	275	272	444	493	743	843	278	431	608
16	1337	680	1419	1303	667	528	1330	1273	1079	825	724	563	958	1001	1165	222	428	667	577	936	1166	254	288	460	573	793	923	265	491	649
18	1458	698	1531	1407	669	519	1363	1375	1208	919	790	544	1062	1168	1329	234	445	654	648	1050	1250	259	285	475	608	872	1039	271	511	693
20	1572	749	1626	1526	723	559	1526	1512	1287	948	792	573	1174	1267	1382	249	485	730	687	1192	1359	274	279	505	628	974	1162	284	532	753
22	1655	761	1668	1651	760	546	1629	1572	1428	995	836	586	1243	1391	1492	252	472	720	729	1264	1464	301	292	496	742	1028	1206	291	547	754
24	1819	797	1881	1806	763	569	1693	1659	1501	1072	865	601	1293	1484	1523	269	487	741	809	1375	1593	278	291	519	794	1073	1337	323	565	833
26	1907	778	1959	1925	785	600	1772	1741	1579	1125	883	607	1453	1535	1686	253	521	772	830	1428	1677	287	319	554	825	1233	1387	290	611	909
28	2024	798	2040	1983	798	562	1879	1903	1692	1126	900	645	1468	1572	1750	263	510	782	908	1507	1763	298	291	553	855	1232	1450	303	608	910
30	2061	809	2132	2125	862	561	1999	1976	1734	1153	898	639	1582	1683	1829	262	534	821	953	1541	1881	286	321	603	913	1287	1506	308	603	952
32	2222	842	2227	2182	856	591	2022	1968	1862	1166	951	646	1704	1799	1913	253	554	809	1035	1648	1940	275	308	571	954	1377	1567	325	612	960
34	2288	832	2345	2338	872	560	2142	2115	1892	1226	930	657	1781	1915	1958	282	512	853	1096	1802	2001	291	335	604	989	1458	1634	315	606	1035
36	2401	914	2459	2453	889	601	2161	2216	1939	1271	947	658	1818	1983	2115	268	543	854	1100	1874	2143	284	321	621	1027	1502	1723	330	639	1044
38	2478	889	2461	2453	880	607	2214	2276	2121	1307	995	630	1883	2014	2131	276	546	872	1171	1935	2244	299	320	607	1105	1576	1775	310	704	1050
40	2499	875	2639	2544	921	612	2363	2338	2093	1296	1012	653	1952	2128	2209	283	566	899	1161	1970	2209	295	335	616	1138	1612	1830	319	689	1071
42	2569	905	2684	2555	915	612	2359	2413	2164	1340	1015	660	2091	2212	2267	304	596	909	1187	2109	2309	307	314	612	1185	1589	1875	327	709	1112
44	2674	938	2664	2747	934	619	2434	2452	2235	1312	1035	647	2116	2188	2339	294	546	907	1223	2135	2410	314	342	641	1212	1699	1968	318	691	1125
46	2697	923	2734	2741	975	611	2495	2548	2269	1432	1069	649	2247	2301	2401	290	580	923	1331	2238	2506	324	344	659	1196	1701	2008	368	680	1144
48	2734	966	2877	2915	925	636	2548	2617	2378	1386	1020	674	2285	2338	2445	277	563	955	1358	2248	2533	317	358	658	1277	1819	2001	335	702	1215
50	2782	957	2912	2912	969	655	2610	2719	2432	1406	1081	711	2332	2469	2580	299	562	947	1369	2360	2603	305	316	680	1263	1859	2005	337	733	1162
52	2954	982	3053	3000	1009	659	2638	2664	2470	1482	1082	655	2417	2496	2598	309	600	1008	1439	2415	2702	339	343	658	1318	1888	2150	351	726	1188
54	2922	949	3021	3023	952	648	2758	2750	2485	1483	1115	675	2469	2590	2627	294	597	969	1447	2475	2735	340	343	676	1393	1907	2152	367	747	1264
56	3054	990	3020	3116	1016	639	2785	2823	2620	1500	1063	658	2500	2602	2726	311	599	1007	1543	2464	2788	325	343	699	1420	1977	2222	360	755	1291
58	3151	994	3154	3182	960	624	2775	2829	2628	1526	1117	693	2547	2635	2707	305	636	988	1521	2531	2840	327	371	662	1467	2066	2281	366	802	1294
60	3115	1020	3128	3221	999	659	2842	2839	2701	1538	1087	699	2644	2727	2786	308	632	1026	1547	2558	2901	347	359	693	1486	2039	2304	338	769	1286
62	3251	989	3289	3293	1014	662	2925	2944	2761	1489	1105	731	2712	2798	2811	328	620	998	1547	2598	2941	349	361	667	1575	2156	2359	362	796	1295
64	3260	1040	3281	3300	1009	662	2928	3035	2813	1550	1124	703	2750	2849	2914	308	659	1006	1685	2648	2985	347	371	699	1522	2146	2361	346	756	1367
66	3292	997	3318	3319	1022	712	2954	3108	2848	1613	1132	667	2757	2857	2959	306	625	1025	1752	2732	3134	342	368	681	1549	2137	2472	357	748	1321
68	3371	1057	3428	3355	1011	682	3035	3064	2857	1586	1188	691	2845	2896	2945	321	651	1105	1716	2804	3153	346	349	709	1651	2265	2477	406	790	1375
70	3412	992	3423	3474	1016	682	3073	3176	2931	1591	1133	719	2941	2966	3034	323	663	1036	1733	2815	3135	351	390	705	1661	2187	2524	379	771	1322
72	3424	1053	3467	3482	1065	666	3065	3213	2994	1637	1198	727	2970	3028	3066	308	648	1043	1808	2894	3165	341	359	719	1612	2362	2603	386	786	1394
74	3457	1035	3522	3553	1009	672	3115	3204	3003	1590	1193	735	3000	3075	3131	321	644	1082	1817	2983	3326	373	388	740	1734	2299	2561	390	758	1398
76	3510	1066	3587	3561	1045	693	3199	3323	2967	1592	1162	716	3022	3073	3158	327	637	1044	1826	2985	3283	379	366	742	1710	2413	2670	394	847	1393
78	3551	1050	3593	3584	1106	685	3206	3220	3072	1652	1157	727	3029	3062	3171	325	655	1118	1926	3020	3381	340	395	746	1739	2408	2622	377	805	1379
80	3562	1068	3601	3645	1050	679	3362	3320	3143	1619	1202	717	3129	3156	3237	341	669	1035	1893	3079	3384	354	376	736	1779	2449	2612	362	839	1435
82	3669	1060	3701	3702	1048	677	3252	3387	3196	1633	1222	751	3242	3194	3309	323	677	1067	1982	3175	3439	351	399	719	1799	2538	2717	400	843	1481
84	3656	1107	3771	3747	1113	690	3280	3445	3262	1788	1211	767	3204	3263	3289	330	656	1107	1945	3170	3500	383	390	742	1845	2440	2741	384	830	1444
86	3691	1089	3822	3773	1059	711	3387	3413	3191	1747	1221	716	3215	3276	3443	338	645	1108	2059	3168	3557	373	390	748	1854	2530	2803	408	814	1528
88	3759	1089	3842	3771	1105	658	3387	3523	3285	1665	1217	740	3263	3279	3375	351	644	1130	1995	3230	3611	366	377	745	1873	2608	2842	387	849	1470
90	3770	1074	3803	3809	1099	700	3364	3519	3332	1704	1212	767	3350	3310	3446	333	695	1152	2058	3274	3598	371	372	718	1917	2606	2843	390	856	1492
92	3781	1063	3901	3862	1088	699	3536	3568	3369	1771	1229	733	3273	3409	3483	386	678	1111	2026	3287	3619	361	396	736	1994	2644	2860	406	831	1485
94	3822	1144	3808	3949	1113	693	3487	3599	3409	1743	1254	736	3297	3426	3575	348	713	1141	2069	3368	3689	372	415	770	1983	2633	2928	433	858	1547
96	3851	1113	3919	3945	1148	702	3511	3610	3479	1776	1226	745	3351	3440	3503	356	692	1164	2107	3323	3669	362	389	733	1998	2684	2915	403	893	1512
98	3870	1127	3930	4025	1114	696	3496	3658	3387	1766	1271	735	3447	3474	3560	344	705	1165	2125	3408	3789	359	394	781	2076	2650	2975	410	876	1537
100	3986	1103	3990	4046	1125	709	3598	3645	3487	1757	1266	761	3488	3534	3577	352	676	1156	2177	3418	3708	378	431	785	1988	2722	3019	424	873	1492
102	3929	1075	3976	4088	1103	748	3596	3726	3476	1800	1240	767	3554	3462	3541	349	721	1147	2181	3448	3837	362	363	802	2029	2785	3019	412	868	1580
104	4038	1119	4042	4073	1150	701	3539	3765	3582	1793	1289	742	3461	3553	3649	348	691	1181	2219	3465	3864	374	420	774	2069	2748	3074	425	899	1615
106	3951	1124	4015	4135	1154	751	3740	3765	3562	1777	1260	767	3526	3555	3715	350	700	1208	2177	3569	3793	373	395	813	2074	2793	3034	411	893	1592
108	3968	1125	4144	4183	1121	725	3727	3810	3551	1809	1271	789	3601	3667	3728	383	703	1181	2286	3540	3885	375	392	779	2141	2874	3162	424	873	1547
110	4036	1175	4146	4251	1149	744	3724	3832	3650	1856	1264	760	3636	3643	3684	369	708	1148	2303	3678	3907	394	410	808	2125	2812	3155	404	900	1530
112	4166	1144	4125	4236	1145	727	3760	3870	3636	1813	1289	753	3674	3613	3740	361	728	1209	2347	3711	3955	395	427	800	2172	2925	3146	434	908	1580
114	4132	1136	4169	4211	1137	747	3728	3838	3716	1845	1260	777	3707	3697	3823	381	734	1196	2339	3693	3956	377	446	806	2199	2949	3132	444	913	1629
116	4110	1133	4093	4271	1169	714	3722	3859	3696	1818	1319	771	3852	3789	3814	368	720	1229	2373	3726	4014	382	413	787	2229	2909	3198	438	901	1613
118	4130	1185	4194	4304	1131	742	3790	3897	3627	1900	1250	786	3730	3808	3830	364	720	1213	2385	3648	3978	407	415	759	2208	2983	3196	419	897	1595
120	4202	1170	4360	4320	1153	753	3781	3995	3777	1817	1254	747	3782	3816	3854	348	746	1227	2383	3718	4039	386	425	806	2289	2977	3179	438	927	1626
122	4190	1175	4268	4385	1162	712	3849	3967	3744	1874	1338	739	3763	3879	3888	401	770	1215	2430	3769	4080	388	430	799	2288	3000	3296	427	905	1625
124	4236	1155	4301	4389	1141	712	3822	4001	3762	1883	1352	789	3852	3825	3862	363	706	1222	2504	3790	4147	407	408	760	2309	3045	3298	433	944	1696
126	4213	1230	4348	4348	1190	736	3845	4031	3850	1879	1308	791	3867	3833	3952	384	747	1250	2498	3822	4107	412	441	791	2300	3090	3339	443	913	1632
128	4207	1158	4361	4440	1184	709	3928	4012	3893	1880	1284	822	3931	3873	3988	391	726	1218	2504	3843	4135	379	441	840	2328	3128	3312	416	957	1670
130	4308	1177	4348	4477	1186	750	3884	4111	3843	1912	1330	778	3860	3883	3972	375	713	1187	2512	3913	4041	394	436	758	2325	3110	3312	438	950	1706
132	4286	1180	4389	4501	1210	778	3902	4096	3893	1905	1360	798	3918	3993	4047	369	752	1215	2521	3827	4219	394	414	838	2334	3176	3318	458	945	1696
134	4320	1183	4312	4472	1219	726	4017	4097	3914	1915	1334	803	3899	3933	3993	371	741	1228	2548	3849	4199	405	426	826	2410	3086	3354	463	948	1701
136	4250	1159	4387	4424	1184	770	3949	4105	3919	1912	1367	787	4047	4002	4104	364	727	1202	2564	3963	4248	421	443	837	2382	3153	3404	456	952	1694
138	4346	1181	4448	4461	1196	713	4028	4123	4038	1952	1315	851	3956	3949	4053	380	744	1228	2611	3991	4243	413	438	836	2436	3204	3418	471	941	1681
140	4323	1207	4475	4497	1218	752	4053	4168	3960	1889	1331	803	4013	4038	4082	376	754	1235	2559	3997	4239	407	421	852	2404	3160	3524	450	996	1743
142	4331	1168	4426	4543	1199	770	4088	4150	4052	1932	1351	832	4024	4035	4148	406	755	1266	2584	3976	4255	379	434	815	2449	3238	3537	441	933	1705
144	4399	1194	4421	4608	1181	769	4040	4155	4088	1955	1389	841	4053	4089	4127	367	706	1283	2565	4034	4319	414	449	833	2470	3279	3438	439	1002	1762
146	4404	1208	4479	4565	1231	802	4067	4288	4043	1967	1348	805	4067	4080	4136	393	718	1213	2717	4027	4201	400	452	824	2518	3240	3450	473	983	1697
148	4377	1210	4540	4610	1212	743	4047	4197	4086	1920	1361	796	4114	4194	4152	385	781	1237	2711	4047	4412	420	443	805	2462	3198	3586	467	961	1714
150	4397	1227	4582	4646	1221	756	4165	4213	4074	1921	1367	805	4092	4079	4154	415	756	1247	2725	4101	4325	422	432	853	2574	3324	3496	456	985	1705
152	4391	1201	4517	4565	1210	750	4102	4223	4130	1916	1316	822	4107	4210	4194	412	747	1236	2718	4175	4389	407	441	810	2535	3330	3604	474	962	1725
154	4510	1185	4578	4676	1198	765	4129	4307	4141	1977	1394	859	4208	4182	4186	383	744	1275	2762	4103	4313	441	438	842	2555	3345	3597	486	1007	1764
156	4492	1214	4533	4696	1226	747	4107	4335	4139	1990	1386	845	4205	4248	4147	387	764	1279	2703	4124	4386	419	443	816	2560	3395	3596	475	978	1782
158	4436	1239	4558	4600	1257	759	4135	4299	4246	1991	1339	801	4217	4205	4254	365	772	1288	2748	4110	4411	437	453	841	2575	3386	3590	464	975	1805
160	4490	1250	4592	4755	1232	738	4193	4340	4096	2002	1404	804	4281	4260	4259	392	766	1257	2813	4208	4466	431	430	842	2602	3403	3624	458	1026	1792
162	4563	1238	4604	4660	1226	789	4183	4374	4272	1984	1377	824	4280	4300	4267	407	767	1277	2815	4194	4456	438	453	845	2660	3393	3620	477	986	1739
164	4534	1247	4586	4766	1226	750	4162	4455	4277	1999	1337	824	4284	4227	4284	409	760	1309	2823	4210	4442	438	462	841	2670	3438	3602	447	1008	1805
166	4453	1194	4700	4750	1222	788	4234	4463	4245	2052	1372	833	4176	4257	4280	387	783	1293	2828	4215	4367	404	461	850	2675	3467	3604	485	1006	1797
168	4599	1227	4695	4719	1230	771	4243	4503	4205	1994	1334	856	4358	4257	4337	413	767	1301	2839	4345	4461	416	477	831	2706	3457	3740	491	1023	1762
170	4584	1267	4639	4725	1197	805	4349	4412	4419	1989	1388	834	4327	4265	4376	408	766	1330	2876	4294	4544	446	448	859	2693	3459	3671	482	992	1803
172	4574	1256	4786	4763	1198	783	4262	4434	4258	1958	1318	851	4371	4312	4288	393	759	1307	2901	4345	4627	434	464	855	2713	3548	3693	484	994	1835
174	4694	1260	4687	4861	1230	779	4253	4454	4273	2076	1397	819	4320	4214	4387	434	763	1361	2865	4312	4610	434	450	846	2717	3500	3733	481	1049	1828
176	4717	1250	4696	4690	1220	787	4254	4457	4264	2064	1389	834	4341	4380	4305	399	797	1310	2913	4337	4479	419	487	831	2743	3509	3713	471	996	1868
178	4618	1243	4701	4770	1266	823	4323	4474	4308	2036	1390	858	4430	4336	4399	401	784	1313	2939	4291	4546	456	477	850	2748	3512	3781	486	1021	1872
180	4564	1236	4666	4729	1244	753	4229	4519	4332	2074	1337	844	4405	4315	4406	404	795	1342	2911	4392	4511	454	466	847	2775	3553	3814	491	1021	1892
182	4603	1246	4707	4806	1305	760	4337	4503	4379	2076	1400	845	4431	4474	4418	409	779	1330	2887	4454	4618	448	449	838	2821	3584	3754	494	973	1868
184	4633	1254	4725	4800	1271	761	4333	4381	4400	2044	1364	849	4389	4475	4404	433	799	1283	3015	4378	4586	436	476	853	2695	3542	3811	474	1042	1818
186	4639	1241	4758	4786	1246	738	4380	4456	4292	2009	1382	817	4403	4415	4425	428	802	1375	2980	4358	4668	427	482	842	2791	3622	3823	481	1034	1867
188	4752	1266	4801	4835	1243	802	4291	4471	4349	2048	1401	876	4503	4411	4412	433	811	1341	3078	4400	4659	405	496	871	2775	3616	3942	509	1020	1864
190	4669	1251	4818	4857	1272	794	4373	4548	4339	2099	1355	837	4464	4435	4431	397	808	1339	2991	4421	4694	449	487	862	2818	3597	3806	489	1058	1868
192	4713	1286	4780	4826	1253	789	4280	4562	4435	2040	1393	881	4451	4515	4481	430	730	1333	3024	4509	4620	436	471	831	2839	3580	3887	507	1052	1895
194	4605	1330	4791	4880	1281	853	4423	4510	4488	2111	1425	836	4469	4416	4566	406	836	1371	3059	4412	4632	427	477	873	2897	3665	3887	481	1046	1937
196	4681	1247	4832	4795	1277	808	4402	4624	4443	2058	1410	837	4522	4481	4525	430	768	1364	3080	4427	4793	446	460	888	2922	3683	3828	494	1065	1901
198	4724	1281	4846	4856	1331	800	4316	4604	4411	2101	1363	870	4520	4494	4503	412	826	1374	3057	4555	4667	444	495	886	2906	3736	3937	538	1065	1898
200	4747	1294	4782	4940	1292	810	4373	4609	4470	2175	1384	859	4494	4485	4551	443	794	1374	3062	4556	4722	448	483	880	2919	3738	3891	484	1052	1832
202	4780	1263	4884	4866	1241	804	4454	4670	4475	2130	1403	925	4634	4538	4537	409	810	1376	3157	4534	4758	469	480	897	2940	3766	3961	504	1078	1907
204	4697	1296	4889	4882	1272	818	4472	4610	4452	2103	1371	871	4615	4463	4498	398	776	1372	3118	4480	4865	473	478	900	2907	3702	4005	494	1068	1910
206	4655	1259	4861	4894	1316	810	4451	4592	4570	2030	1411	855	4561	4518	4508	428	819	1305	3166	4531	4718	457	508	865	2945	3758	3928	516	1072	1933
208	4676	1272	4794	4932	1300	779	4412	4515	4478	2094	1391	897	4523	4602	4556	447	844	1397	3107	4602	4753	452	482	866	2947	3753	3918	522	1069	1944
210	4771	1287	4834	4950	1227	842	4525	4696	4530	2083	1388	864	4672	4633	4534	421	814	1375	3153	4563	4777	470	485	907	2925	3763	3971	540	1058	1896
212	4725	1317	4866	4938	1319	801	4457	4612	4444	2101	1442	868	4605	4445	4606	431	829	1346	3194	4537	4877	463	500	906	2989	3808	3992	502	1055	1914
214	4805	1340	4937	4972	1281	825	4543	4622	4609	2100	1403	886	4617	4687	4652	429	826	1367	3195	4499	4852	457	504	869	3022	3755	4089	521	1076	1936
216	4760	1287	4937	4928	1326	831	4564	4695	4496	2154	1451	895	4675	4620	4686	428	821	1357	3181	4579	4842	488	493	887	3023	3811	4064	532	1062	1958
218	4873	1289	4897	4978	1319	790	4486	4722	4522	2189	1413	909	4701	4498	4681	416	809	1346	3263	4631	4853	445	514	934	3014	3817	4048	529	1056	1935
220	4838	1343	4949	4960	1321	843	4453	4746	4558	2141	1388	874	4711	4582	4730	444	815	1407	3157	4564	4762	478	515	904	3044	3922	4038	518	1086	1955
222	4822	1305	4949	5032	1317	799	4479	4721	4625	2184	1445	866	4727	4603	4592	458	829	1365	3260	4555	4808	440	497	896	3070	3870	4012	516	1068	1906
224	4820	1279	4872	4947	1335	837	4549	4723	4534	2158	1457	903	4602	4564	4723	427	817	1356	3231	4649	4860	456	507	923	3058	3834	4142	501	1067	1925
226	4813	1309	5011	4970	1280	845	4555	4705	4572	2133	1478	880	4741	4628	4667	431	853	1392	3316	4660	4912	466	501	862	3063	3828	4112	534	1101	1962
228	4810	1361	4962	4994	1289	801	4515	4700	4597	2199	1424	881	4744	4710	4554	465	811	1374	3322	4693	4905	465	490	910	3043	3912	3987	557	1101	1912
230	4852	1319	4888	4933	1297	838	4538	4638	4678	2211	1468	898	4571	4661	4737	453	821	1380	3302	4640	4843	470	528	931	3091	3914	4085	530	1125	2007
232	4860	1320	4983	4983	1306	818	4686	4682	4643	2182	1462	863	4743	4716	4661	443	844	1405	3310	4692	4822	469	502	885	3040	3982	4123	495	1075	1977
234	4876	1317	4948	4907	1300	835	4607	4777	4575	2137	1416	898	4766	4642	4705	464	812	1449	3329	4571	4978	478	497	896	3070	3929	4132	530	1104	1977
236	4943	1266	4999	4940	1321	838	4626	4730	4599	2153	1487	881	4724	4755	4766	434	833	1395	3313	4654	4994	473	481	902	3097	3912	4155	532	1102	2006
238	4897	1302	4974	5012	1294	836	4517	4695	4622	2145	1418	872	4777	4703	4729	438	833	1379	3333	4694	4924	502	493	894	3179	3938	4225	542	1116	1940
240	4941	1340	5009	5063	1315	828	4612	4770	4661	2115	1453	920	4762	4700	4755	448	839	1359	3344	4673	4919	486	502	875	3143	4001	4148	540	1125	2042
242	4941	1263	4966	5029	1309	843	4600	4709	4603	2168	1467	876	4825	4617	4721	454	858	1437	3412	4724	4881	486	510	922	3113	4011	4174	510	1116	2010
244	4902	1349	5017	5052	1329	833	4625	4867	4593	2205	1475	912	4749	4668	4750	435	844	1373	3357	4784	4992	480	514	961	3211	4041	4171	560	1110	1989
246	4866	1337	5037	4962	1342	821	4569	4828	4705	2200	1457	903	4896	4725	4778	446	873	1398	3341	4732	4927	469	505	906	3219	3936	4191	543	1089	2033
248	4951	1353	4981	5023	1310	843	4613	4773	4709	2233	1487	910	4758	4698	4786	438	817	1420	3404	4748	4959	506	511	946	3206	3996	4149	553	1093	2002
250	4989	1317	5044	5009	1321	835	4715	4835	4699	2159	1449	890	4858	4768	4728	460	877	1416	3426	4697	4931	491	525	946	3228	4031	4175	540	1073	1991
252	4953	1371	5033	5026	1370	863	4655	4779	4666	2228	1476	909	4785	4738	4883	420	880	1437	3477	4718	4948	513	518	949	3179	4032	4242	547	1158	2049
254	4890	1350	4978	5112	1346	828	4673	4819	4685	2232	1440	949	4892	4706	4816	469	823	1454	3445	4721	4982	471	506	936	3184	4059	4167	522	1072	2052
256	4908	1389	5029	5051	1358	848	4605	4817	4745	2187	1475	900	4887	4839	4833	423	851	1429	3421	4760	5000	482	502	937	3299	4051	4219	575	1097	2051
258	4970	1354	5146	5089	1321	834	4665	4869	4717	2263	1473	906	4829	4893	4821	457	833	1427	3463	4821	4910	473	507	923	3251	4047	4253	547	1120	2022
260	5070	1366	4989	5022	1355	824	4660	4786	4723	2187	1474	918	4817	4731	4892	427	893	1466	3410	4827	5092	487	517	940	3258	4095	4184	549	1116	2024
262	4995	1371	5144	5102	1314	842	4682	4856	4729	2209	1451	926	4947	4795	4874	456	840	1427	3520	4889	5070	493	537	910	3266	4023	4163	538	1166	2039
264	4998	1367	5046	5064	1353	834	4681	4830	4679	2175	1512	925	4887	4818	4854	461	883	1481	3524	4902	5009	474	507	979	3285	4139	4261	554	1125	2095
266	5005	1364	5215	5044	1347	835	4655	4902	4745	2241	1525	897	4884	4723	4797	435	832	1416	3545	4778	4968	481	542	970	3296	4046	4324	559	1148	2053
268	4971	1351	5107	5035	1331	828	4648	4892	4734	2221	1495	940	4966	4869	4882	451	852	1445	3520	4908	5044	500	523	957	3284	4093	4252	557	1182	1995
270	5021	1336	5114	5161	1319	851	4697	4854	4778	2232	1486	955	4966	4860	4838	470	864	1499	3476	4892	5002	490	473	955	3244	4078	4281	558	1123	2039
272	4991	1357	5073	5042	1300	845	4733	4847	4791	2178	1522	947	4863	4830	4887	466	840	1437	3515	4857	5046	506	522	948	3314	4112	4426	553	1107	2021
274	4926	1384	5066	5056	1344	853	4661	4890	4772	2188	1522	968	4920	4830	4795	447	864	1445	3565	4909	5049	485	539	902	3341	4105	4280	555	1171	2081
276	4996	1356	5079	5118	1257	864	4728	4899	4834	2228	1488	886	4946	4826	4933	447	833	1465	3550	4858	5076	497	546	970	3326	4130	4322	539	1153	2080
278	4997	1304	5067	5075	1384	849	4679	4895	4785	2220	1513	978	4899	4936	4950	477	878	1421	3561	4894	5073	511	510	942	3347	4115	4322	536	1187	2075
280	4990	1377	5219	5145	1342	877	4810	4868	4828	2258	1512	919	4952	4848	4889	472	858	1440	3523	4837	4961	496	497	975	3334	4174	4319	574	1133	2103
282	5037	1372	5114	5164	1357	841	4719	4953	4801	2230	1531	955	4936	4895	4929	494	861	1478	3612	4945	5122	483	563	945	3352	4155	4393	533	1096	2074
284	5069	1395	5134	4988	1306	910	4754	4858	4865	2212	1466	920	4977	4881	4986	482	904	1488	3606	4873	5024	499	555	953	3344	4129	4371	565	1153	2001
286	5106	1366	5053	5172	1409	867	4759	4985	4805	2237	1549	909	4922	4886	4891	456	865	1466	3594	4891	5153	505	510	951	3468	4158	4396	564	1158	2061
288	5026	1369	5230	5149	1337	881	4858	4930	4835	2262	1501	982	4984	4916	4940	474	895	1431	3560	4939	5114	479	529	949	3388	4094	4418	554	1156	2124
290	4959	1376	5123	5138	1375	881	4864	4924	4868	2322	1519	951	4940	4869	4981	468	849	1452	3632	4831	5072	527	537	1009	3424	4172	4284	570	1163	2090
292	5058	1397	5120	5142	1348	829	4756	4917	4821	2303	1503	950	4980	4876	4917	487	899	1486	3631	4926	5173	497	544	953	3379	4273	4299	563	1154	2079
294	5025	1376	5080	5037	1399	868	4842	5011	4776	2265	1538	973	4942	4941	4985	440	888	1438	3637	4917	5045	499	556	963	3439	4177	4398	546	1193	2113
296	4947	1377	5068	5140	1355	887	4765	4930	4794	2276	1580	943	4962	4906	4995	472	870	1522	3695	4912	4977	514	555	961	3387	4184	4396	586	1199	2110
298	5007	1378	5227	5099	1383	852	4812	4922	4820	2279	1558	938	4982	4884	4999	479	874	1454	3688	4933	5104	524	555	936	3481	4255	4394	582	1190	2115
300	5052	1327	5127	5145	1376	832	4779	4944	4892	2318	1544	958	4965	4877	4964	488	908	1474	3711	4995	5073	476	518	962	3484	4255	4416	569	1155	2111
302	4986	1394	5088	5164	1392	867	4745	4920	4877	2259	1520	958	4933	4936	5041	501	898	1517	3670	4896	5148	515	529	954	3529	4265	4406	578	1210	2101
304	5110	1333	5145	5150	1376	868	4856	5012	4925	2309	1527	939	5102	4911	4999	486	920	1515	3586	4946	5196	535	542	964	3417	4264	4443	581	1187	2080
306	5064	1424	5175	5149	1397	872	4782	5064	4890	2199	1553	924	4951	4910	4950	484	861	1467	3617	5011	5014	512	521	988	3449	4247	4480	582	1194	2145
308	5073	1396	5162	5137	1365	885	4921	5063	4916	2333	1532	964	5019	4951	4914	473	889	1516	3693	4938	5162	507	563	949	3489	4274	4434	554	1177	2101
310	5203	1372	5154	5077	1346	857	4926	4980	4905	2249	1524	969	5027	4906	5007	476	872	1477	3733	4988	5278	510	526	980	3419	4241	4584	586	1190	2134
312	5239	1384	5143	5239	1374	872	4822	5011	4880	2301	1532	976	5102	4962	5002	488	943	1556	3689	4931	5090	536	586	956	3512	4217	4437	570	1145	2068
314	5068	1412	5110	5123	1374	902	4799	5028	4915	2332	1557	939	5007	4963	4967	482	904	1502	3779	4971	5261	517	540	977	3534	4335	4439	586	1216	2091
316	5071	1413	5126	5199	1406	890	4819	5040	4934	2386	1514	918	5123	4917	5066	484	894	1519	3667	4975	5140	513	539	966	3573	4291	4517	564	1167	2104
318	5061	1418	5207	5167	1416	871	4875	5042	4890	2316	1600	948	4935	5009	4961	464	902	1488	3733	5023	5187	515	547	970	3495	4331	4434	594	1188	2110
320	5120	1406	5192	5191	1389	879	4861	4984	4924	2260	1577	971	5065	4945	5008	468	893	1540	3836	4971	5216	530	549	962	3617	4287	4450	573	1191	2150
322	5023	1405	5218	5050	1373	844	4872	5012	4839	2334	1569	941	5018	4893	4954	475	936	1500	3743	5010	5177	538	559	953	3492	4297	4430	575	1180	2100
324	5145	1381	5194	5247	1350	882	4838	5012	4998	2265	1546	961	5052	4980	4974	489	932	1516	3850	5026	5121	538	538	983	3559	4272	4491	576	1161	2107
326	5188	1426	5254	5171	1382	885	4863	4888	4925	2308	1578	972	5104	5056	5065	497	879	1513	3797	4967	5132	519	549	1014	3690	4380	4566	577	1210	2109
328	5032	1397	5181	5123	1402	912	4902	4943	4932	2388	1572	945	5068	4993	5089	460	890	1487	3761	5082	5204	510	565	987	3616	4275	4601	606	1215	2143
330	5195	1385	5103	5185	1423	840	4865	4952	4984	2311	1547	969	5095	4995	5069	464	945	1481	3798	5016	5104	532	605	963	3604	4284	4573	597	1207	2215
332	5045	1417	5193	5127	1368	908	4832	5052	4969	2362	1557	974	5055	5084	5113	506	879	1550	3773	5050	5182	499	546	1025	3556	4435	4533	612	1223	2105
334	5072	1413	5241	5162	1451	895	4799	5053	4963	2369	1593	955	5044	5050	5097	464	911	1531	3854	5135	5192	512	543	1001	3612	4310	4498	591	1186	2145
336	5112	1405	5266	5194	1372	868	4923	5026	4968	2311	1526	942	5146	5045	5151	498	908	1516	3828	5015	5229	528	545	1013	3613	4320	4533	592	1183	2142
338	5180	1392	5209	5203	1399	875	4956	5066	4919	2300	1575	946	5050	4912	5076	490	900	1542	3761	5015	5195	516	580	1010	3668	4351	4583	584	1206	2194
340	5051	1434	5196	5236	1468	900	4962	5041	4995	2363	1573	970	5047	5093	5105	512	897	1539	3854	5033	5189	523	562	968	3554	4395	4536	609	1197	2171
342	5101	1427	5188	5211	1418	938	4895	4982	4977	2301	1586	961	5122	5129	5120	501	910	1564	3839	5016	5198	531	575	974	3589	4413	4550	608	1182	2137
344	5176	1463	5279	5207	1385	890	4783	5014	5027	2315	1582	974	5110	5111	5051	491	901	1525	3863	5043	5280	540	583	993	3597	4456	4574	595	1194	2193
346	5050	1429	5183	5156	1382	875	4952	4938	5053	2299	1636	923	5201	5063	5128	499	943	1529	3938	5186	5221	527	560	984	3661	4371	4616	581	1225	2148
348	5042	1479	5225	5202	1423	869	4985	5159	5002	2338	1559	942	5123	5058	5127	489	948	1480	3888	5017	5330	553	562	1017	3655	4393	4623	618	1159	2216
350	5091	1449	5350	5115	1392	893	4905	4956	5034	2337	1586	1013	5177	5046	5098	502	907	1530	3923	5056	5352	533	581	992	3602	4483	4594	606	1233	2152
352	5079	1423	5321	5219	1461	875	4896	5050	5069	2291	1574	989	5106	5100	5073	518	884	1562	3826	5102	5238	512	563	972	3635	4427	4570	594	1222	2163
354	5180	1466	5286	5141	1459	911	4962	5081	5062	2281	1590	981	5076	5083	5014	481	944	1518	3914	5163	5146	549	591	1014	3701	4497	4588	626	1221	2190
356	5137	1418	5145	5152	1368	866	4943	5088	4958	2382	1611	956	5125	5107	5174	503	960	1525	3867	5012	5410	561	541	981	3698	4467	4644	593	1223	2212
358	5206	1424	5258	5207	1408	898	4975	5026	5028	2361	1591	1006	5209	5126	5140	468	925	1546	3955	5170	5186	551	569	1014	3751	4466	4606	571	1235	2228
360	5091	1443	5238	5264	1405	883	4899	5037	5117	2369	1591	993	5188	4994	5138	487	941	1529	3929	5150	5272	534	541	966	3666	4425	4629	597	1218	2157
362	5138	1466	5174	5262	1427	870	4907	5014	5025	2393	1568	956	5242	5030	5152	511	951	1617	3907	5128	5251	541	563	987	3739	4395	4610	596	1191	2227
364	5158	1389	5280	5174	1414	908	4976	5104	5007	2389	1576	994	5219	5026	5040	520	957	1603	3948	5116	5252	546	590	1001	3727	4399	4578	596	1233	2179
366	5080	1427	5243	5249	1387	897	5050	5108	5000	2408	1591	986	5223	5151	5097	491	937	1567	4029	5114	5274	534	558	979	3680	4458	4594	593	1284	2260
368	5118	1427	5188	5096	1390	897	4959	5113	5100	2359	1616	994	5250	5074	5216	548	970	1557	3990	5181	5333	577	551	1005	3716	4432	4663	608	1247	2244
370	5055	1475	5190	5222	1434	908	5045	5109	5032	2392	1620	1014	5179	5138	5124	510	904	1585	3970	5160	5278	528	571	982	3757	4470	4633	604	1301	2206
372	5101	1439	5246	5312	1463	921	4909	5063	5068	2371	1562	992	5214	5173	5096	496	904	1558	3993	5213	5309	533	578	1013	3719	4531	4566	599	1229	2257
374	5061	1449	5251	5180	1465	872	4969	5059	4980	2362	1556	1005	5206	5033	5084	501	940	1542	3919	5119	5246	561	585	1033	3749	4448	4684	616	1243	2220
376	5105	1471	5186	5156	1470	881	5096	5117	5106	2427	1621	987	5163	5096	5074	513	932	1574	4064	5189	5264	551	562	1014	3746	4455	4623	603	1250	2268
378	5046	1468	5337	5157	1487	879	4997	5203	4991	2366	1593	944	5286	5124	5183	487	941	1579	3963	5146	5222	557	587	993	3800	4528	4714	604	1199	2261
380	5077	1471	5245	5223	1434	910	4973	5145	5124	2435	1604	980	5260	5121	5140	518	935	1618	4034	5187	5377	519	608	1000	3703	4541	4699	605	1246	2226
382	5187	1450	5287	5155	1421	888	4980	5122	5055	2364	1618	1041	5226	5130	5131	508	931	1585	3993	5207	5306	543	598	1035	3770	4565	4634	620	1260	2265
384	5233	1451	5217	5298	1426	931	5025	5064	5168	2462	1616	968	5135	5113	5116	507	935	1576	3964	5102	5176	567	578	1041	3787	4555	4664	627	1223	2269
386	5148	1429	5236	5295	1450	894	5014	5213	5091	2456	1605	1031	5189	5056	5198	523	920	1531	4007	5062	5337	548	581	1044	3705	4535	4720	610	1226	2268
388	5091	1430	5258	5275	1432	899	5131	5189	5061	2331	1592	984	5264	5152	5187	494	949	1571	4063	5207	5325	532	606	1041	3695	4568	4665	611	1256	2218
390	5175	1469	5244	5242	1410	910	5014	5166	5127	2407	1577	995	5288	5147	5234	507	970	1572	3999	5152	5285	540	569	1008	3739	4542	4655	594	1214	2270
392	5128	1434	5218	5101	1475	967	5143	5076	5088	2403	1603	973	5246	5100	5150	525	942	1582	3923	5087	5201	552	572	1018	3802	4608	4688	608	1261	2266
394	5182	1483	5232	5238	1474	900	5062	5109	5137	2344	1648	960	5239	5050	5177	509	936	1563	3984	5105	5351	553	607	989	3823	4630	4709	601	1271	2268
396	5031	1436	5272	5257	1472	899	5125	5219	4993	2372	1611	970	5185	5089	5081	496	976	1578	4153	5183	5373	549	574	1034	3782	4499	4676	592	1271	2258
398	5190	1470	5251	5213	1439	926	4972	5117	5086	2401	1633	1007	5168	5119	5188	521	963	1551	4118	5186	5269	562	596	1026	3785	4572	4613	595	1268	2200
400	5265	1486	5318	5176	1418	974	4963	5115	5142	2442	1591	963	5143	5075	5165	535	965	1563	4024	5178	5312	556	602	1041	3877	4596	4765	631	1297	2257
402	5225	1452	5273	5224	1503	934	4992	5132	5087	2432	1614	998	5321	5142	5190	509	921	1572	4057	5152	5312	567	584	1031	3805	4563	4779	606	1250	2233
404	5118	1468	5294	5289	1419	929	4977	5153	5031	2434	1582	1012	5222	5132	5143	540	933	1580	4095	5255	5232	545	611	1073	3803	4607	4699	615	1236	2262
406	5176	1518	5310	5226	1460	910	5133	5200	5029	2362	1643	967	5171	5171	5130	507	978	1586	4048	5207	5359	543	625	1046	3747	4539	4642	645	1259	2286
408	5171	1466	5315	5278	1495	926	5012	5130	5069	2446	1626	1033	5246	5197	5203	505	940	1560	4017	5195	5323	547	596	1082	3804	4663	4708	660	1251	2209
410	5180	1481	5286	5185	1430	902	5056	5113	5179	2450	1637	1013	5275	5123	5189	533	983	1578	4115	5201	5385	560	596	1035	3801	4516	4799	621	1255	2275
412	5295	1479	5292	5217	1524	881	4970	5183	5080	2371	1595	974	5243	5131	5090	502	991	1627	4085	5261	5327	591	574	1041	3833	4563	4735	653	1304	2313
414	5159	1493	5241	5196	1468	964	5034	5180	5077	2402	1648	1027	5186	5115	5238	541	978	1564	4033	5256	5311	546	612	1008	3828	4581	4800	616	1280	2235
416	5167	1475	5362	5110	1454	905	5139	5225	5187	2377	1628	992	5268	5179	5208	525	964	1626	4106	5280	5299	574	587	1049	3870	4589	4768	631	1309	2286
418	5171	1446	5212	5266	1462	915	5068	5254	5086	2452	1657	1039	5153	5147	5258	530	971	1607	4136	5235	5333	569	593	1005	3909	4570	4642	632	1290	2255
420	5221	1476	5215	5255	1467	941	4998	5101	5198	2443	1590	1034	5226	5213	5249	539	951	1550	4145	5252	5274	562	576	1042	3846	4649	4762	664	1270	2285
422	5160	1463	5300	5236	1446	952	4906	5290	5168	2444	1610	999	5239	5111	5308	521	982	1598	4197	5185	5279	576	591	1011	3905	4646	4883	658	1272	2232
424	5250	1493	5334	5253	1448	916	5051	5157	5091	2474	1655	1007	5268	5055	5214	536	972	1622	4194	5242	5344	535	581	1051	3963	4687	4729	635	1303	2293
426	5085	1470	5262	5283	1519	961	5165	5101	5111	2446	1611	1034	5215	5143	5259	515	952	1626	4205	5173	5337	606	590	1031	3981	4723	4779	626	1267	2252
428	5240	1474	5329	5258	1479	936	5011	5194	5121	2425	1616	1025	5327	5084	5129	528	961	1626	4232	5226	5306	551	598	1045	4029	4618	4705	615	1295	2241
430	5213	1494	5274	5160	1441	914	4966	5148	5122	2438	1652	1025	5212	5292	5334	542	984	1624	4121	5297	5356	565	591	1021	4005	4566	4795	632	1289	2301
432	5238	1488	5344	5313	1441	943	5039	5149	5064	2419	1659	1035	5241	5245	5144	519	1019	1607	4141	5250	5398	557	598	1081	3942	4670	4754	617	1238	2318
434	5147	1487	5320	5234	1460	946	5098	5181	5131	2437	1689	993	5253	5228	5245	526	981	1627	4245	5335	5315	575	637	1010	3966	4611	4807	643	1285	2302
436	5262	1498	5349	5201	1497	952	5101	5143	5155	2432	1617	1052	5278	5206	5192	518	968	1628	4150	5228	5240	553	617	1061	3998	4693	4802	634	1273	2341
438	5160	1474	5333	5254	1504	922	5025	5225	5129	2466	1626	1030	5228	5209	5280	511	985	1667	4162	5245	5329	532	598	1036	3965	4578	4759	658	1299	2273
440	5112	1482	5279	5171	1481	905	5199	5175	5105	2493	1615	1030	5276	5180	5287	512	987	1643	4173	5290	5320	573	604	1037	3874	4602	4816	651	1319	2255
442	5154	1497	5292	5272	1468	904	5067	5174	5137	2418	1634	1022	5276	5184	5271	499	930	1648	4202	5187	5406	554	602	1056	3972	4662	4784	660	1306	2326
444	5167	1473	5288	5289	1517	926	5075	5297	5205	2403	1633	986	5250	5157	5146	510	969	1634	4151	5193	5315	556	600	1060	3960	4580	4752	649	1280	2299
446	5193	1495	5331	5267	1441	945	5057	5219	5128	2380	1687	1035	5330	5140	5286	536	966	1668	4092	5273	5404	574	621	1072	4020	4731	4806	655	1234	2325
448	5261	1468	5330	5379	1469	969	5115	5126	5099	2424	1672	1018	5329	5167	5292	514	998	1676	4119	5262	5388	540	636	1058	3942	4618	4848	659	1241	2302
450	5201	1530	5385	5283	1440	890	5110	5134	5196	2425	1675	1067	5290	5294	5269	518	992	1618	4192	5278	5371	577	617	1022	3915	4642	4705	622	1320	2322
452	5175	1534	5366	5329	1470	944	5084	5136	5237	2457	1634	1003	5299	5264	5297	525	966	1619	4203	5230	5322	554	596	1076	3964	4718	4781	644	1278	2346
454	5142	1523	5374	5299	1474	932	5101	5243	5176	2489	1648	1037	5282	5316	5198	540	973	1656	4234	5346	5320	578	621	1070	3978	4664	4847	665	1276	2339
456	5251	1500	5320	5290	1491	946	5165	5173	5131	2451	1671	1063	5332	5130	5335	493	964	1630	4204	5259	5432	583	620	1022	3915	4656	4852	642	1302	2356
458	5253	1491	5310	5206	1510	937	5120	5178	5171	2373	1670	1062	5200	5233	5274	529	1005	1640	4174	5263	5322	573	666	1045	3972	4851	4840	654	1291	2309
460	5180	1520	5324	5167	1483	918	5166	5179	5114	2497	1640	1094	5394	5192	5272	501	1004	1642	4230	5307	5358	526	612	1063	3979	4701	4874	665	1326	2318
462	5279	1462	5391	5370	1468	938	5112	5219	5193	2484	1619	1049	5308	5221	5253	530	970	1672	4222	5289	5386	544	615	1060	3987	4656	4869	644	1285	2317
464	5282	1461	5422	5219	1565	957	5189	5240	5296	2461	1705	1066	5248	5209	5356	507	1028	1603	4298	5224	5350	562	614	1023	3988	4757	4893	673	1299	2308
466	5217	1509	5328	5263	1531	932	5046	5197	5175	2467	1676	1032	5256	5241	5268	544	971	1633	4243	5345	5348	537	607	1065	4110	4742	4826	660	1324	2307
468	5235	1473	5342	5284	1484	982	5122	5183	5191	2417	1619	1092	5406	5161	5345	538	956	1698	4244	5257	5352	549	624	1040	4112	4726	4879	653	1286	2364
470	5212	1507	5458	5245	1528	938	5091	5218	5208	2460	1658	1024	5329	5183	5249	526	983	1739	4286	5329	5327	561	618	1068	3948	4731	4888	671	1305	2334
472	5220	1520	5255	5270	1462	928	5043	5196	5154	2473	1648	1028	5277	5144	5214	521	953	1628	4292	5231	5324	578	612	1061	4025	4687	4841	630	1345	2343
474	5165	1540	5346	5288	1522	931	5092	5237	5198	2462	1605	1031	5345	5209	5265	513	984	1633	4278	5324	5366	575	600	1072	4022	4690	4833	644	1310	2307
476	5234	1563	5372	5247	1513	902	5186	5184	5168	2542	1655	1002	5239	5147	5213	537	973	1675	4248	5168	5385	575	603	1055	4091	4690	4852	638	1344	2349
478	5279	1553	5273	5234	1485	964	4984	5266	5156	2535	1670	1080	5244	5292	5279	534	993	1638	4162	5333	5402	560	627	1056	4046	4673	4878	690	1318	2356
480	5159	1531	5326	5311	1474	953	5185	5240	5187	2454	1678	1089	5325	5204	5279	533	940	1648	4320	5244	5261	581	626	1071	4078	4636	4832	652	1296	2281
482	5125	1525	5321	5329	1449	960	5085	5154	5261	2463	1684	1042	5385	5127	5249	533	980	1643	4329	5163	5315	574	634	1073	4025	4731	4898	636	1332	2296
484	5202	1531	5221	5266	1513	972	5151	5142	5060	2509	1673	1054	5367	5243	5407	528	1030	1625	4353	5251	5308	573	583	1054	4102	4731	4852	665	1303	2354
486	5208	1528	5324	5307	1495	963	5074	5234	5106	2480	1711	1064	5327	5218	5272	531	1035	1620	4267	5307	5447	596	626	1116	4073	4751	4918	657	1299	2383
488	5103	1519	5326	5195	1513	926	5049	5230	5190	2502	1687	1084	5347	5277	5312	542	981	1699	4285	5263	5360	554	589	1120	4106	4724	4979	660	1296	2409
490	5169	1473	5362	5291	1504	955	5087	5199	5255	2522	1684	1060	5309	5181	5322	529	1005	1677	4390	5267	5365	560	635	1012	4060	4743	4887	653	1317	2420
492	5169	1490	5260	5332	1520	963	5155	5221	5200	2479	1670	1069	5310	5204	5346	558	1018	1709	4225	5349	5317	581	652	1071	4127	4889	4853	712	1363	2372
494	5184	1533	5323	5313	1507	959	5079	5193	5136	2492	1740	1111	5313	5207	5362	508	986	1658	4292	5358	5322	587	593	1083	4098	4777	4889	667	1284	2425
496	5297	1569	5391	5267	1498	932	5115	5306	5165	2487	1706	1048	5374	5309	5359	529	1010	1667	4373	5302	5462	593	631	1068	4062	4713	4874	692	1336	2411
498	5242	1500	5376	5302	1471	952	5133	5242	5177	2485	1652	1066	5394	5260	5332	535	1018	1673	4317	5258	5332	567	635	1054	4160	4753	4886	661	1351	2348
500	5161	1537	5337	5327	1523	963	5195	5252	5268	2525	1646	1065	5352	5317	5324	572	1022	1691	4269	5349	5357	553	635	1104	4135	4790	4910	678	1379	2355
502	5192	1521	5308	5312	1525	932	5121	5225	5239	2495	1664	1065	5350	5229	5420	525	1037	1671	4359	5285	5334	558	642	1089	4094	4688	4928	685	1355	2357
504	5187	1513	5420	5297	1558	974	5072	5225	5316	2491	1706	1087	5343	5287	5336	548	1039	1706	4384	5274	5401	587	627	1061	4162	4771	4950	676	1370	2391
506	5251	1557	5363	5265	1476	951	5081	5215	5221	2405	1668	1061	5287	5271	5349	532	1021	1667	4397	5353	5408	593	634	1081	4097	4781	4896	666	1361	2372
508	5282	1532	5377	5268	1523	984	5029	5275	5254	2429	1646	1056	5309	5175	5397	511	1010	1671	4327	5291	5387	584	636	1100	4163	4770	4902	646	1364	2416
510	5199	1512	5294	5278	1524	1012	5134	5271	5272	2561	1704	1044	5332	5282	5387	550	1042	1676	4377	5315	5450	598	637	1089	4128	4811	4828	644	1349	2363
512	5272	1535	5308	5322	1534	943	5142	5271	5196	2506	1703	1062	5365	5300	5358	545	1027	1682	4417	5341	5393	587	635	1031	4111	4745	4955	667	1336	2412
514	5317	1515	5250	5298	1517	955	5145	5209	5185	2526	1666	1062	5380	5369	5329	552	970	1771	4399	5377	5406	561	610	1093	4087	4795	4909	634	1375	2456
516	5266	1539	5236	5317	1483	931	5089	5216	5217	2571	1716	1095	5484	5310	5304	554	1002	1710	4366	5346	5455	558	629	1088	4186	4896	4985	697	1359	2379
518	5237	1531	5398	5309	1512	1000	5092	5306	5284	2509	1675	1052	5296	5272	5307	545	1008	1679	4292	5346	5364	588	682	1071	4151	4812	4910	660	1365	2450
520	5309	1592	5358	5304	1501	938	5134	5270	5207	2629	1679	1065	5362	5238	5327	542	980	1679	4282	5402	5458	590	622	1064	4264	4755	4959	671	1369	2463
522	5281	1581	5453	5221	1524	940	5258	5173	5272	2536	1719	1091	5403	5312	5385	557	1022	1697	4529	5265	5391	587	654	1091	4144	4852	4872	687	1355	2435
524	5242	1579	5379	5351	1538	984	5152	5225	5166	2540	1724	1081	5398	5182	5306	543	1014	1734	4491	5409	5482	585	630	1111	4146	4857	4934	679	1364	2406
526	5261	1563	5402	5279	1500	965	5123	5253	5203	2505	1723	1080	5518	5218	5254	560	1031	1704	4434	5417	5407	584	656	1095	4110	4789	4993	688	1382	2394
528	5292	1580	5386	5263	1510	981	5179	5260	5304	2552	1735	1050	5318	5349	5384	543	1024	1702	4437	5311	5408	606	683	1096	4203	4811	4890	694	1346	2411
530	5187	1558	5204	5293	1556	952	5181	5240	5254	2524	1666	1084	5271	5308	5379	574	1059	1778	4475	5397	5431	590	627	1060	4182	4814	4896	686	1368	2432
532	5291	1548	5389	5255	1562	959	5159	5222	5269	2512	1702	1039	5271	5189	5315	540	1033	1683	4386	5340	5366	568	660	1051	4203	4807	4943	685	1398	2356
534	5362	1522	5325	5272	1497	967	5166	5191	5153	2453	1755	1055	5397	5257	5411	528	1020	1697	4357	5394	5459	606	624	1110	4181	4835	4981	666	1381	2427
536	5289	1579	5352	5218	1550	974	5158	5266	5141	2480	1731	1076	5389	5284	5323	533	981	1703	4345	5406	5379	605	669	1104	4220	4849	4928	706	1405	2423
538	5151	1508	5379	5251	1511	942	5138	5246	5148	2583	1670	1101	5358	5274	5322	536	1012	1673	4387	5494	5495	578	652	1087	4205	4858	4971	672	1332	2430
540	5288	1565	5431	5263	1540	963	5172	5261	5264	2569	1678	1043	5399	5234	5387	563	1011	1715	4385	5369	5456	579	651	1057	4059	4872	4995	687	1357	2402
542	5341	1571	5350	5278	1481	979	5217	5312	5286	2465	1729	1079	5392	5333	5419	540	1023	1684	4317	5344	5412	593	655	1101	4192	4860	4914	684	1370	2413
544	5235	1545	5375	5347	1555	957	5204	5124	5261	2549	1713	1044	5355	5321	5317	559	1028	1716	4408	5351	5411	620	655	1119	4179	4820	4914	716	1413	2430
546	5218	1565	5277	5262	1565	944	5085	5326	5211	2461	1677	1097	5313	5153	5296	560	1010	1722	4406	5415	5411	573	631	1114	4234	4867	4874	694	1371	2422
548	5200	1564	5390	5318	1543	997	5240	5242	5171	2512	1680	1073	5363	5306	5406	539	1075	1753	4441	5398	5402	574	679	1080	4218	4815	5035	683	1371	2449
550	5269	1533	5257	5271	1582	991	5072	5195	5210	2410	1761	1107	5483	5242	5327	530	1028	1697	4446	5401	5435	587	653	1129	4185	4847	4841	697	1355	2395
552	5192	1547	5243	5324	1519	943	5193	5309	5283	2572	1686	1090	5328	5171	5366	552	1050	1721	4494	5358	5405	582	639	1080	4247	4842	4982	726	1335	2437
554	5292	1528	5424	5381	1534	942	5100	5281	5265	2458	1718	1079	5304	5239	5344	564	1047	1684	4514	5318	5472	619	643	1093	4300	4911	4942	699	1367	2438
556	5332	1508	5377	5389	1530	991	5111	5296	5280	2502	1736	1107	5365	5219	5315	550	1043	1705	4447	5266	5418	619	668	1090	4205	4805	5025	677	1362	2436
558	5214	1603	5263	5370	1510	978	5160	5256	5283	2485	1734	1071	5369	5278	5285	555	1065	1760	4386	5397	5442	569	639	1139	4243	4800	4933	703	1426	2430
560	5340	1537	5381	5386	1531	982	5129	5289	5265	2547	1707	1104	5339	5217	5341	570	1055	1757	4455	5327	5353	592	616	1121	4263	4825	4917	679	1400	2448
562	5226	1565	5342	5231	1529	1007	5106	5310	5208	2513	1699	1107	5376	5253	5339	573	1038	1721	4605	5401	5339	594	654	1090	4134	4893	5033	700	1399	2506
564	5245	1574	5379	5438	1507	1013	5243	5300	5190	2525	1750	1050	5400	5338	5389	566	1049	1727	4452	5302	5453	615	657	1135	4221	4822	4930	662	1407	2506
566	5202	1547	5393	5178	1552	967	5290	5236	5212	2538	1727	1118	5401	5387	5463	538	1051	1748	4489	5408	5500	634	642	1073	4264	4864	5008	728	1389	2493
568	5258	1579	5461	5217	1550	937	5221	5230	5259	2525	1758	1086	5318	5230	5377	548	1049	1735	4526	5433	5338	562	692	1061	4298	4884	4994	681	1402	2442
570	5216	1626	5372	5381	1576	964	5201	5274	5304	2489	1698	1105	5333	5284	5321	558	1002	1736	4493	5382	5323	571	653	1134	4244	4882	5009	687	1400	2419
572	5249	1604	5350	5309	1503	974	5175	5215	5337	2605	1728	1076	5346	5289	5364	583	1042	1784	4488	5310	5392	610	666	1104	4353	4897	4951	733	1394	2572
574	5220	1596	5334	5359	1521	987	5302	5245	5246	2596	1743	1088	5297	5365	5415	572	1084	1752	4450	5430	5424	600	662	1124	4200	4913	5018	714	1371	2466
576	5333	1533	5317	5318	1571	995	5272	5301	5269	2532	1712	1066	5429	5330	5421	537	1026	1742	4543	5420	5496	612	658	1122	4269	4805	4994	679	1382	2470
578	5206	1588	5309	5233	1562	989	5254	5359	5280	2609	1693	1057	5447	5285	5379	569	1092	1724	4586	5360	5549	582	647	1126	4327	4856	4976	693	1322	2433
580	5321	1574	5412	5232	1533	972	5183	5320	5288	2567	1726	1057	5446	5333	5345	533	1034	1776	4495	5322	5395	639	684	1095	4321	4803	5042	675	1385	2420
582	5285	1578	5388	5340	1593	982	5196	5261	5213	2609	1740	1089	5260	5247	5393	554	1026	1763	4515	5367	5452	599	672	1152	4233	4925	5010	696	1363	2485
584	5364	1555	5342	5345	1543	984	5122	5217	5150	2528	1704	1095	5412	5307	5393	533	1042	1724	4587	5483	5339	575	673	1102	4310	4885	4944	706	1406	2490
586	5245	1578	5337	5349	1581	1008	5163	5274	5261	2593	1715	1108	5352	5294	5256	577	1055	1735	4480	5375	5501	577	661	1123	4312	4932	4991	690	1338	2477
588	5311	1530	5338	5298	1566	1002	5253	5262	5268	2659	1702	1128	5403	5255	5389	564	1048	1766	4567	5351	5399	593	706	1108	4329	4919	4979	686	1413	2482
590	5197	1557	5367	5387	1563	969	5271	5342	5228	2533	1733	1123	5328	5363	5306	560	1106	1817	4506	5353	5396	601	634	1118	4227	4883	4968	689	1413	2506
592	5263	1561	5393	5362	1574	1000	5239	5349	5349	2575	1691	1083	5368	5281	5366	549	1065	1732	4529	5408	5400	612	650	1127	4301	4851	5024	713	1411	2418
594	5240	1588	5391	5311	1581	971	5256	5261	5230	2585	1772	1065	5312	5282	5342	548	1013	1751	4616	5333	5369	586	664	1108	4281	5030	5031	697	1442	2489
596	5238	1526	5437	5243	1582	1000	5243	5369	5266	2598	1758	1122	5405	5265	5368	547	1011	1704	4526	5366	5331	637	672	1132	4296	4966	5123	706	1458	2498
598	5281	1578	5358	5341	1559	985	5239	5368	5255	2629	1774	1107	5407	5239	5405	552	1029	1718	4521	5322	5452	611	668	1158	4295	4942	4962	695	1432	2514
600	5250	1594	5411	5342	1552	985	5226	5236	5300	2554	1680	1100	5349	5247	5355	561	1065	1770	4615	5299	5387	615	687	1115	4372	4897	4986	713	1384	2413
602	5235	1613	5448	5356	1611	1001	5162	5282	5239	2514	1749	1136	5397	5224	5383	536	1080	1760	4519	5352	5458	604	698	1117	4367	4938	5004	704	1377	2518
604	5306	1576	5348	5331	1589	981	5293	5360	5340	2570	1715	1099	5445	5316	5412	576	1025	1770	4590	5354	5309	620	662	1113	4221	4887	5062	708	1376	2508
606	5292	1555	5354	5317	1553	1017	5171	5313	5252	2648	1733	1097	5398	5284	5324	560	1054	1732	4483	5395	5372	586	701	1134	4331	4927	5030	743	1381	2483
608	5300	1583	5340	5248	1538	990	5174	5293	5212	2571	1741	1070	5404	5318	5442	565	1041	1785	4464	5344	5454	601	646	1130	4401	4909	5061	718	1422	2392
610	5197	1605	5310	5252	1563	1015	5226	5294	5337	2531	1778	1115	5361	5309	5374	567	1053	1779	4569	5362	5440	609	663	1109	4288	4953	4991	718	1431	2482
612	5242	1577	5394	5398	1602	984	5061	5294	5241	2610	1742	1105	5349	5222	5369	568	1075	1756	4628	5475	5470	598	671	1169	4229	4947	4990	671	1410	2506
614	5174	1573	5351	5303	1549	968	5215	5267	5330	2558	1696	1099	5331	5284	5340	562	1057	1769	4602	5254	5403	592	718	1134	4326	4892	5086	711	1378	2473
616	5322	1581	5494	5260	1580	981	5212	5239	5318	2598	1685	1137	5385	5308	5403	561	1098	1806	4576	5506	5382	607	659	1099	4340	4981	5095	685	1402	2450
618	5304	1573	5466	5256	1602	1010	5200	5350	5243	2648	1748	1107	5393	5305	5338	599	1038	1793	4671	5343	5485	646	663	1109	4340	4876	5048	719	1405	2503
620	5387	1628	5409	5306	1621	1032	5214	5348	5200	2583	1716	1080	5423	5289	5434	555	1105	1817	4541	5408	5434	585	690	1142	4389	4919	5133	714	1429	2488
622	5292	1538	5372	5251	1610	1017	5213	5354	5202	2618	1732	1070	5415	5400	5407	561	1105	1771	4534	5378	5408	591	686	1162	4283	4978	4979	728	1410	2450
624	5241	1544	5277	5281	1610	992	5276	5264	5387	2593	1757	1081	5435	5319	5472	556	1116	1741	4613	5376	5479	586	670	1120	4294	4995	5074	691	1465	2509
626	5288	1564	5287	5269	1576	991	5205	5287	5220	2574	1709	1125	5365	5347	5334	580	1076	1829	4589	5347	5463	632	668	1164	4362	4917	5039	728	1453	2502
628	5266	1533	5299	5304	1600	978	5164	5270	5291	2626	1740	1114	5464	5221	5470	568	1067	1774	4542	5427	5485	605	646	1156	4301	4929	4956	737	1409	2456
630	5216	1557	5376	5305	1566	1003	5256	5242	5296	2600	1734	1095	5371	5290	5374	587	1087	1741	4678	5410	5548	616	707	1180	4264	5078	5133	727	1443	2510
632	5229	1565	5371	5289	1608	1003	5303	5300	5276	2536	1796	1117	5362	5320	5393	577	1044	1829	4616	5366	5411	611	646	1142	4346	4958	4965	727	1421	2495
634	5141	1574	5368	5278	1576	1023	5240	5234	5289	2621	1696	1134	5389	5240	5438	581	1069	1820	4599	5502	5490	603	635	1178	4344	4965	5104	747	1436	2560
636	5217	1583	5347	5253	1595	995	5240	5293	5265	2561	1792	1127	5357	5338	5333	602	1083	1861	4646	5347	5448	631	688	1150	4328	4957	5065	735	1391	2499
638	5307	1619	5365	5282	1591	994	5136	5354	5283	2653	1751	1100	5450	5408	5387	570	1040	1773	4563	5422	5415	640	661	1150	4331	4943	4997	724	1444	2555
640	5215	1591	5382	5405	1565	989	5231	5212	5262	2608	1755	1078	5397	5497	5435	557	1096	1808	4665	5347	5473	619	682	1128	4341	4944	5102	749	1448	2525
642	5345	1572	5423	5332	1507	1009	5290	5302	5254	2565	1775	1122	5474	5341	5361	575	1071	1770	4604	5452	5402	599	676	1168	4420	5060	5043	733	1430	2439
644	5264	1619	5462	5323	1570	1022	5226	5229	5324	2577	1758	1134	5477	5246	5412	547	1072	1762	4624	5427	5419	625	692	1148	4435	5073	5072	741	1435	2547
646	5177	1621	5363	5326	1597	989	5194	5248	5318	2569	1763	1103	5431	5346	5314	594	1089	1786	4592	5376	5466	625	690	1181	4364	4948	5064	722	1469	2476
648	5274	1626	5349	5206	1546	997	5168	5277	5321	2556	1768	1110	5475	5359	5393	587	1077	1765	4562	5425	5440	616	677	1171	4328	5024	5084	695	1448	2477
650	5238	1627	5388	5368	1581	1000	5178	5269	5243	2651	1780	1124	5331	5275	5426	578	1072	1793	4655	5371	5431	614	664	1180	4422	5047	5048	732	1454	2497
652	5286	1627	5425	5310	1594	978	5195	5319	5204	2632	1736	1112	5316	5225	5357	596	1098	1780	4605	5345	5453	637	660	1180	4351	4912	5064	689	1415	2572
654	5272	1578	5443	5353	1583	976	5200	5325	5277	2569	1809	1129	5368	5298	5428	559	1064	1751	4582	5416	5427	610	717	1125	4465	4963	5094	754	1421	2550
656	5297	1598	5369	5276	1561	966	5221	5304	5181	2604	1754	1100	5354	5352	5280	576	1072	1834	4636	5396	5432	618	682	1127	4477	5052	4953	717	1466	2478
658	5270	1586	5285	5311	1641	1014	5166	5275	5320	2622	1768	1119	5397	5349	5354	590	1062	1782	4628	5490	5488	619	684	1136	4382	4884	5059	735	1405	2505
660	5280	1607	5438	5324	1607	1045	5285	5282	5357	2626	1767	1158	5354	5395	5375	586	1074	1794	4594	5479	5386	622	668	1160	4343	5071	5104	744	1445	2518
662	5324	1594	5406	5203	1547	958	5268	5324	5148	2666	1824	1147	5433	5387	5373	565	1071	1775	4675	5388	5488	642	685	1137	4384	5009	5070	700	1445	2520
664	5263	1532	5370	5395	1594	1025	5239	5445	5359	2618	1769	1133	5371	5366	5303	578	1080	1758	4767	5393	5453	613	700	1119	4448	5012	5081	719	1457	2549
666	5228	1629	5391	5304	1594	1062	5235	5251	5257	2575	1711	1153	5389	5286	5410	596	1092	1786	4641	5440	5362	612	694	1138	4415	4924	5101	750	1425	2559
668	5285	1604	5325	5298	1549	1044	5262	5423	5357	2591	1758	1129	5357	5315	5372	556	1106	1835	4725	5352	5343	613	678	1108	4453	4973	4986	728	1468	2563
670	5172	1624	5376	5314	1629	1021	5179	5350	5339	2648	1821	1101	5307	5282	5273	584	1085	1805	4715	5367	5440	623	674	1157	4406	5086	5028	755	1413	2476
672	5209	1622	5354	5310	1572	1001	5286	5298	5294	2611	1756	1168	5466	5310	5420	552	1124	1824	4640	5422	5556	623	657	1114	4429	4998	5029	711	1455	2583
674	5275	1633	5421	5299	1578	972	5144	5335	5298	2639	1789	1109	5397	5301	5394	597	1075	1801	4657	5417	5413	607	669	1134	4465	5008	5023	725	1408	2558
676	5186	1574	5425	5267	1599	1014	5203	5218	5264	2654	1756	1144	5419	5328	5465	564	1058	1803	4720	5450	5487	603	688	1142	4442	5016	5143	731	1452	2538
678	5297	1630	5365	5322	1576	974	5292	5251	5324	2680	1744	1140	5365	5286	5367	572	1097	1788	4699	5396	5405	633	712	1151	4520	5007	5056	725	1455	2555
680	5327	1607	5503	5364	1571	998	5240	5382	5238	2648	1793	1158	5443	5302	5462	572	1118	1801	4716	5384	5471	618	726	1158	4423	4929	5070	700	1493	2606
682	5294	1623	5448	5355	1600	1054	5217	5309	5215	2669	1745	1161	5418	5344	5403	585	1119	1785	4753	5392	5384	594	695	1126	4439	5050	5032	744	1415	2506
684	5303	1584	5387	5299	1597	1031	5237	5389	5256	2578	1797	1145	5426	5464	5456	576	1069	1829	4692	5397	5376	644	652	1138	4458	5068	5103	682	1432	2620
686	5252	1629	5326	5348	1577	1009	5162	5299	5293	2658	1792	1154	5451	5370	5478	584	1121	1789	4672	5365	5560	629	702	1176	4480	4990	5139	764	1487	2499
688	5349	1654	5471	5270	1615	1012	5344	5367	5296	2571	1795	1140	5389	5321	5448	580	1102	1817	4666	5358	5424	645	691	1171	4448	4999	5110	760	1459	2553
690	5345	1616	5401	5256	1575	995	5225	5271	5338	2618	1761	1140	5473	5282	5372	565	1069	1771	4659	5389	5431	643	703	1140	4458	5048	5141	733	1460	2516
692	5331	1608	5327	5310	1619	971	5240	5307	5242	2621	1749	1139	5392	5388	5386	606	1082	1846	4692	5436	5427	643	699	1130	4541	5017	5098	735	1482	2557
694	5227	1630	5337	5215	1634	1001	5277	5323	5273	2644	1772	1092	5407	5420	5450	586	1110	1783	4764	5444	5421	644	682	1116	4491	5041	5097	745	1464	2582
696	5248	1634	5393	5279	1619	993	5151	5249	5299	2587	1751	1159	5352	5332	5426	573	1079	1867	4708	5519	5417	643	705	1156	4467	5043	5042	733	1473	2570
698	5258	1669	5352	5378	1662	1016	5278	5358	5272	2576	1816	1137	5450	5255	5386	590	1093	1761	4653	5453	5371	647	675	1126	4432	5012	5051	725	1404	2652
700	5279	1591	5309	5338	1622	988	5320	5299	5340	2661	1802	1108	5373	5389	5405	572	1096	1870	4663	5357	5435	623	695	1147	4534	5005	5139	754	1520	2581
702	5397	1643	5421	5198	1603	1037	5270	5277	5298	2670	1757	1163	5449	5407	5388	558	1098	1757	4711	5397	5503	640	707	1168	4465	5136	5104	767	1469	2583
704	5278	1624	5363	5290	1607	1061	5312	5277	5264	2628	1772	1192	5360	5345	5414	552	1104	1859	4767	5393	5504	639	717	1136	4404	4940	5059	706	1465	2536
706	5263	1633	5406	5276	1621	998	5299	5281	5253	2672	1729	1154	5424	5238	5391	561	1104	1848	4615	5418	5397	613	694	1160	4561	4962	5150	751	1461	2576
708	5291	1614	5379	5229	1599	1007	5196	5372	5256	2571	1787	1167	5429	5335	5363	574	1069	1828	4716	5456	5446	630	668	1148	4523	4980	5069	702	1498	2554
710	5296	1663	5355	5302	1651	1026	5305	5356	5304	2680	1772	1129	5364	5413	5385	583	1065	1868	4770	5434	5530	626	698	1175	4495	5047	5048	737	1510	2577
712	5244	1621	5379	5331	1619	1074	5177	5339	5197	2567	1774	1154	5410	5408	5358	562	1113	1820	4662	5465	5466	621	675	1132	4563	5015	5219	759	1469	2579
714	5405	1635	5414	5231	1687	1031	5176	5382	5301	2655	1840	1151	5409	5332	5404	588	1116	1837	4864	5354	5428	657	680	1164	4531	4990	5064	746	1485	2559
716	5386	1621	5372	5303	1613	1009	5267	5343	5288	2616	1787	1152	5467	5321	5407	582	1082	1831	4705	5523	5427	606	743	1191	4428	5039	5182	769	1449	2511
718	5258	1671	5412	5384	1616	1022	5269	5312	5254	2661	1782	1115	5434	5340	5415	599	1096	1826	4673	5442	5463	665	710	1118	4525	4993	5109	782	1494	2591
720	5202	1615	5372	5296	1569	1009	5273	5334	5330	2625	1753	1150	5437	5326	5467	583	1118	1897	4722	5404	5488	657	717	1175	4509	5017	5026	788	1465	2653
722	5361	1641	5482	5238	1604	1056	5184	5226	5169	2567	1754	1130	5421	5303	5409	578	1116	1835	4710	5420	5367	635	704	1190	4479	5056	5138	767	1485	2588
724	5305	1563	5400	5311	1643	1043	5242	5365	5328	2695	1764	1159	5402	5473	5433	582	1094	1833	4815	5502	5418	648	691	1190	4475	4944	5215	725	1488	2607
726	5315	1628	5374	5273	1637	1013	5305	5328	5272	2615	1816	1199	5505	5246	5438	595	1130	1813	4687	5455	5370	629	686	1146	4525	4988	5168	787	1467	2583
728	5314	1602	5439	5358	1644	1007	5231	5285	5305	2654	1768	1177	5474	5259	5410	585	1102	1862	4688	5438	5495	627	702	1160	4546	5093	5149	715	1479	2612
730	5249	1648	5350	5316	1637	1024	5241	5277	5431	2664	1805	1169	5435	5255	5402	600	1069	1852	4690	5391	5431	621	719	1199	4531	5101	5054	771	1538	2589
732	5296	1643	5503	5353	1615	1002	5308	5255	5305	2718	1781	1151	5459	5385	5404	573	1125	1866	4659	5368	5579	654	685	1223	4467	5041	5086	787	1490	2580
734	5162	1631	5377	5310	1615	1029	5243	5246	5339	2670	1745	1121	5437	5326	5401	592	1103	1842	4775	5421	5406	645	702	1177	4531	5080	5175	746	1521	2561
736	5200	1621	5292	5355	1591	996	5220	5288	5304	2681	1828	1175	5426	5508	5421	578	1137	1851	4793	5454	5459	619	690	1169	4601	4959	5141	746	1475	2671
738	5277	1671	5426	5282	1662	1025	5297	5255	5370	2748	1849	1154	5384	5345	5489	568	1108	1836	4758	5398	5456	640	674	1158	4605	5123	5136	754	1502	2617
740	5297	1548	5415	5379	1647	1021	5282	5317	5347	2614	1721	1167	5456	5355	5405	596	1116	1811	4772	5455	5413	660	713	1184	4491	5092	5237	740	1456	2649
742	5276	1653	5375	5240	1626	1025	5220	5247	5308	2707	1836	1162	5438	5341	5452	616	1107	1841	4778	5414	5532	634	695	1154	4528	5055	5171	782	1470	2614
744	5266	1613	5354	5250	1656	1025	5261	5350	5294	2642	1782	1192	5448	5367	5384	588	1134	1829	4764	5630	5402	620	720	1182	4510	5066	5125	766	1504	2623
746	5261	1613	5355	5321	1639	1049	5267	5272	5337	2690	1830	1153	5431	5468	5466	601	1164	1820	4805	5445	5500	638	683	1146	4554	4985	5132	794	1442	2569
748	5224	1662	5420	5377	1622	1047	5224	5433	5221	2701	1852	1150	5502	5284	5435	588	1150	1890	4777	5474	5466	640	694	1197	4467	5098	5043	779	1491	2639
750	5279	1624	5339	5403	1627	1003	5258	5330	5345	2669	1785	1161	5421	5347	5535	580	1120	1872	4761	5433	5463	676	730	1191	4522	5153	5139	751	1502	2601
752	5214	1653	5442	5199	1640	1048	5221	5362	5237	2683	1846	1108	5480	5285	5367	584	1132	1894	4775	5390	5487	650	691	1190	4598	5095	5097	791	1509	2616
754	5333	1662	5359	5360	1648	1058	5272	5294	5295	2715	1794	1176	5405	5337	5401	588	1106	1894	4795	5396	5450	604	716	1166	4552	5081	5096	779	1470	2607
756	5196	1642	5423	5363	1649	1028	5294	5331	5383	2650	1750	1184	5230	5273	5395	608	1146	1795	4814	5331	5445	658	703	1178	4604	5016	5166	752	1502	2669
758	5301	1681	5462	5357	1613	1055	5294	5288	5318	2655	1810	1181	5401	5371	5468	600	1134	1815	4715	5471	5419	644	708	1198	4540	5159	5218	790	1505	2620
760	5253	1671	5430	5243	1635	1064	5304	5333	5312	2649	1776	1180	5370	5374	5456	573	1094	1887	4762	5344	5462	623	696	1189	4537	5120	5070	763	1464	2620
762	5178	1657	5447	5242	1652	1027	5259	5356	5205	2651	1834	1141	5355	5324	5373	559	1135	1874	4796	5471	5410	652	706	1138	4668	5147	5108	745	1421	2618
764	5305	1666	5428	5316	1635	983	5231	5306	5229	2632	1756	1168	5490	5303	5412	578	1110	1881	4856	5360	5468	668	659	1205	4506	5017	5145	760	1533	2627
766	5349	1684	5407	5207	1622	997	5291	5312	5293	2669	1775	1203	5355	5344	5327	579	1157	1855	4765	5426	5400	629	709	1158	4597	5088	5095	777	1498	2672
768	5329	1685	5390	5345	1635	1041	5199	5248	5285	2713	1816	1221	5422	5345	5394	585	1183	1878	4824	5441	5483	653	695	1190	4585	5076	5111	764	1522	2591
770	5233	1613	5428	5325	1632	1055	5298	5319	5314	2662	1778	1140	5459	5323	5526	583	1120	1857	4826	5477	5432	663	701	1147	4560	5137	5117	802	1514	2670
772	5274	1621	5320	5366	1635	1018	5201	5344	5228	2641	1784	1160	5404	5392	5480	602	1123	1872	4802	5455	5526	667	692	1164	4588	5015	5102	764	1516	2529
774	5268	1645	5373	5302	1694	1038	5228	5242	5317	2677	1834	1168	5527	5389	5408	607	1125	1923	4850	5477	5456	652	709	1140	4612	5042	5267	810	1536	2587
776	5223	1678	5387	5265	1612	986	5248	5297	5370	2626	1785	1176	5386	5359	5407	596	1124	1860	4812	5328	5429	632	720	1218	4634	5025	5190	786	1483	2583
778	5406	1632	5451	5300	1637	1049	5206	5341	5252	2688	1841	1192	5411	5387	5444	590	1110	1928	4917	5385	5474	643	713	1207	4595	5160	5132	768	1504	2636
780	5235	1635	5297	5355	1656	1094	5270	5319	5255	2717	1778	1219	5385	5372	5398	613	1118	1893	4832	5468	5447	637	718	1147	4602	5040	5202	788	1533	2689
782	5303	1673	5394	5355	1662	1060	5279	5271	5334	2765	1845	1155	5446	5392	5377	614	1158	1858	4815	5492	5470	649	740	1179	4624	5154	5023	765	1500	2710
784	5252	1680	5377	5361	1614	1064	5306	5283	5347	2777	1851	1163	5443	5335	5379	609	1105	1894	4778	5455	5472	687	703	1202	4589	5139	5106	792	1501	2648
786	5256	1708	5363	5206	1675	1039	5213	5359	5317	2654	1836	1159	5419	5446	5426	612	1148	1811	4862	5489	5436	624	734	1213	4618	5031	5185	806	1511	2627
788	5305	1650	5365	5308	1636	1015	5294	5304	5268	2687	1888	1187	5537	5411	5405	609	1154	1900	4892	5450	5437	662	726	1140	4642	5125	5103	776	1545	2612
790	5373	1649	5443	5408	1604	1028	5301	5189	5351	2699	1867	1184	5401	5299	5439	603	1165	1875	4839	5456	5443	627	717	1208	4585	5026	5165	753	1535	2651
792	5358	1644	5341	5384	1666	1021	5256	5294	5280	2700	1856	1181	5520	5351	5475	605	1172	1886	4747	5411	5470	615	732	1211	4662	5134	5220	757	1543	2651
794	5264	1660	5378	5258	1650	1038	5191	5261	5339	2677	1791	1149	5383	5370	5390	610	1162	1846	4730	5420	5422	638	697	1159	4587	5174	5172	784	1588	2620
796	5300	1709	5362	5316	1668	1049	5295	5241	5284	2617	1813	1183	5400	5292	5551	595	1128	1845	4819	5544	5421	655	713	1167	4576	5051	5185	769	1566	2711
798	5295	1680	5475	5293	1659	1013	5266	5334	5178	2636	1870	1160	5547	5365	5322	617	1128	1874	4897	5435	5440	667	736	1210	4613	5158	5241	767	1541	2632
800	5226	1675	5338	5369	1659	1021	5360	5333	5280	2803	1811	1184	5419	5320	5435	612	1143	1924	4800	5427	5513	664	725	1223	4654	5047	5204	736	1517	2668
802	5336	1635	5468	5225	1682	1066	5168	5312	5274	2680	1795	1189	5455	5420	5419	642	1130	1935	4907	5438	5437	649	741	1135	4606	5006	5159	779	1505	2648
804	5244	1676	5285	5317	1622	1052	5373	5326	5366	2751	1819	1156	5452	5407	5336	584	1168	1862	4793	5416	5533	637	723	1208	4654	5127	5190	815	1527	2692
806	5290	1650	5454	5234	1654	1041	5230	5293	5382	2661	1806	1193	5419	5270	5363	608	1144	1878	4815	5390	5401	620	731	1180	4624	5116	5158	765	1535	2696
808	5274	1624	5464	5349	1617	1034	5270	5284	5385	2700	1858	1168	5369	5356	5477	615	1147	1877	4981	5426	5455	640	709	1205	4671	5054	5169	772	1588	2572
810	5244	1703	5397	5321	1665	1012	5267	5308	5371	2660	1831	1197	5388	5402	5361	603	1150	1959	4859	5435	5405	677	729	1187	4613	5086	5246	756	1498	2660
812	5326	1660	5461	5284	1641	1042	5245	5296	5310	2732	1878	1182	5344	5294	5379	581	1192	1937	4812	5475	5402	648	732	1201	4630	5082	5196	779	1524	2659
814	5314	1653	5402	5301	1693	1061	5256	5277	5405	2740	1856	1161	5409	5284	5406	593	1136	1894	4966	5530	5488	646	723	1188	4647	5181	5113	762	1567	2659
816	5258	1667	5390	5396	1617	1023	5240	5453	5282	2722	1821	1196	5407	5385	5461	612	1138	1886	4815	5482	5398	633	712	1216	4665	5106	5124	793	1549	2702
818	5444	1646	5339	5311	1699	1034	5311	5257	5297	2668	1823	1235	5448	5317	5376	618	1171	1899	4736	5395	5439	631	724	1202	4616	5057	5182	804	1524	2628
820	5304	1663	5318	5250	1643	1042	5320	5307	5312	2669	1890	1192	5462	5327	5377	601	1137	1891	4896	5542	5496	684	730	1194	4608	5060	5066	807	1553	2688
822	5210	1620	5377	5371	1640	1093	5280	5382	5180	2703	1865	1186	5487	5396	5387	604	1146	1841	4844	5428	5515	613	701	1174	4583	5108	5146	806	1517	2694
824	5337	1694	5355	5249	1673	1037	5264	5373	5296	2754	1850	1153	5448	5411	5471	569	1159	1864	4843	5478	5424	646	724	1224	4646	5090	5196	782	1567	2664
826	5319	1663	5439	5269	1679	1063	5176	5297	5297	2695	1798	1185	5480	5534	5325	619	1137	1887	4857	5494	5486	633	728	1224	4773	5143	5201	793	1540	2583
828	5329	1699	5355	5215	1682	1046	5287	5239	5327	2778	1793	1207	5419	5322	5467	602	1182	1908	4815	5428	5477	657	735	1214	4649	5128	5150	778	1560	2651
830	5269	1676	5304	5251	1636	1085	5227	5404	5298	2707	1896	1205	5487	5340	5350	600	1124	1960	4817	5417	5449	666	755	1246	4723	5063	5185	805	1559	2676
832	5315	1704	5403	5387	1640	1065	5379	5274	5301	2713	1858	1158	5429	5378	5429	592	1127	1873	4910	5488	5403	672	721	1224	4633	5076	5214	782	1571	2683
834	5183	1685	5467	5328	1653	1051	5293	5345	5389	2685	1819	1229	5507	5293	5516	602	1147	1887	4930	5440	5415	655	744	1182	4704	5077	5201	769	1548	2650
836	5377	1695	5351	5352	1641	1065	5275	5350	5351	2747	1831	1226	5473	5448	5502	586	1155	1916	4925	5460	5509	658	733	1210	4629	5034	5131	820	1538	2671
838	5319	1710	5409	5261	1694	1080	5389	5338	5242	2724	1906	1198	5494	5385	5399	615	1173	1914	4853	5472	5453	639	724	1212	4755	5103	5162	802	1515	2705
840	5326	1637	5365	5363	1671	1032	5279	5384	5284	2717	1869	1172	5408	5417	5407	590	1172	1926	4833	5449	5466	684	715	1197	4803	5123	5150	779	1566	2692
842	5168	1674	5365	5186	1622	1049	5300	5402	5283	2739	1828	1156	5427	5383	5427	618	1191	1913	4894	5405	5450	683	746	1266	4694	5088	5126	808	1550	2632
844	5357	1671	5456	5403	1693	1054	5348	5264	5281	2733	1883	1162	5445	5328	5406	608	1169	1905	4927	5349	5408	657	759	1179	4621	5198	5299	831	1572	2647
846	5268	1649	5376	5301	1673	1048	5303	5359	5265	2676	1861	1189	5479	5404	5409	576	1142	1872	4854	5571	5576	676	740	1177	4696	5180	5152	766	1544	2749
848	5291	1683	5400	5271	1699	1064	5261	5317	5372	2703	1816	1190	5450	5345	5524	563	1166	1931	4813	5500	5488	642	761	1210	4710	5079	5310	750	1550	2625
850	5312	1687	5421	5351	1663	1070	5367	5274	5371	2717	1824	1188	5546	5312	5400	604	1173	1930	4840	5519	5456	696	714	1173	4645	5095	5262	818	1562	2672
852	5204	1644	5466	5287	1627	1055	5259	5261	5242	2687	1818	1207	5496	5366	5533	612	1178	1894	4925	5490	5477	657	772	1217	4697	5115	5189	803	1575	2719
854	5310	1629	5357	5273	1693	1051	5244	5298	5421	2647	1813	1198	5384	5438	5440	639	1133	1899	4912	5490	5450	638	733	1247	4736	5158	5260	813	1566	2686
856	5293	1648	5456	5337	1640	1059	5311	5264	5353	2786	1834	1177	5447	5394	5457	617	1128	1891	4948	5406	5533	659	758	1221	4733	5128	5171	824	1583	2650
858	5241	1737	5438	5338	1696	1100	5356	5358	5343	2755	1839	1198	5403	5369	5401	585	1184	1937	4887	5414	5487	675	752	1228	4697	5123	5226	800	1549	2727
860	5253	1667	5355	5195	1655	1036	5336	5343	5351	2697	1830	1223	5374	5422	5471	628	1125	1927	4887	5414	5436	647	725	1195	4736	5218	5145	813	1549	2700
862	5318	1688	5411	5373	1683	1051	5159	5400	5283	2758	1847	1260	5434	5348	5458	607	1188	1818	4902	5415	5442	655	738	1218	4622	5114	5256	827	1578	2733
864	5315	1679	5345	5336	1690	1086	5185	5287	5374	2698	1878	1186	5408	5286	5473	586	1142	1897	4815	5509	5499	681	746	1245	4700	5187	5144	835	1586	2722
866	5302	1666	5301	5384	1633	1067	5343	5306	5411	2727	1852	1211	5446	5377	5499	619	1182	1906	4976	5445	5502	697	753	1209	4722	5104	5173	830	1510	2726
868	5382	1632	5306	5294	1692	1085	5228	5358	5193	2685	1791	1237
870	5318	1690	5373	5320	1649	1059	5280	5408	5323	2705	1808	1197
872	5228	1682	5370	5310	1671	1069	5320	5406	5377	2720	1831	1198
874	5316	1702	5346	5326	1710	1058	5281	5348	5367	2697	1780	1225
876	5212	1723	5389	5336	1665	1075	5387	5353	5301	2709	1822	1216
878	5262	1666	5430	5457	1674	1086	5276	5462	5323	2761	1879	1199
880	5184	1749	5415	5361	1708	1045	5277	5318	5267	2796	1793	1213
882	5319	1732	5452	5369	1689	1108	5326	5189	5252	2721	1865	1193
884	5367	1659	5322	5330	1668	1071	5204	5390	5321	2737	1928	1243
886	5341	1691	5393	5415	1664	1066	5238	5390	5252	2729	1837	1241
888	5310	1703	5340	5313	1704	1065	5334	5366	5322	2722	1827	1252
890	5328	1729	5425	5355	1709	1072	5343	5394	5302	2769	1848	1234
892	5295	1697	5420	5358	1697	1085	5320	5291	5329	2766	1877	1217
894	5298	1683	5403	5283	1701	1060	5351	5339	5315	2715	1904	1227
896	5282	1729	5424	5301	1659	1073	5247	5352	5179	2760	1908	1191
898	5387	1704	5471	5289	1682	1093	5273	5404	5274	2755	1838	1247
900	5296	1732	5375	5318	1709	1070	5292	5251	5304	2744	1822	1232
902	5235	1729	5452	5353	1685	1079	5333	5330	5307	2643	1825	1188
904	5317	1697	5463	5331	1677	1104	5200	5405	5190	2749	1896	1221
906	5288	1713	5406	5303	1644	1111	5264	5383	5361	2719	1872	1238
908	5266	1649	5449	5312	1727	1066	5286	5323	5368	2772	1877	1198
910	5355	1701	5395	5237	1662	1093	5174	5214	5413	2734	1876	1270
912	5270	1715	5480	5375	1700	1040	5397	5313	5305	2727	1845	1220
914	5287	1668	5425	5223	1679	1109	5259	5331	5234	2707	1892	1246
916	5361	1726	5370	5270	1721	1117	5225	5303	5313	2757	1856	1233
918	5273	1638	5403	5398	1702	1097	5310	5362	5182	2765	1927	1253
920	5333	1749	5290	5285	1716	1118	5364	5265	5339	2758	1873	1246
922	5286	1739	5441	5332	1642	1103	5209	5388	5332	2729	1853	1221
924	5313	1746	5317	5368	1641	1101	5243	5279	5392	2763	1860	1277
926	5343	1727	5308	5316	1710	1048	5351	5366	5219	2822	1796	1208
928	5270	1681	5465	5358	1662	1073	5236	5276	5345	2775	1916	1207
930	5203	1725	5454	5424	1640	1093	5306	5251	5266	2717	1859	1229
932	5230	1756	5513	5307	1716	1123	5287	5389	5306	2736	1910	1220
934	5256	1759	5348	5241	1698	1081	5276	5394	5304	2765	1914	1242
936	5253	1716	5433	5293	1686	1063	5311	5378	5287	2784	1900	1260
938	5192	1708	5322	5317	1693	1104	5291	5384	5274	2763	1843	1259
940	5356	1718	5426	5369	1690	1022	5235	5264	5345	2772	1811	1261
942	5250	1700	5445	5338	1731	1021	5280	5368	5350	2755	1930	1241
944	5240	1734	5403	5426	1652	1119	5232	5327	5357	2694	1848	1254
946	5264	1718	5271	5269	1713	1071	5340	5344	5308	2783	1918	1247
948	5295	1669	5427	5284	1713	1085	5338	5341	5328	2717	1867	1244
950	5325	1697	5500	5357	1708	1052	5283	5352	5344	2676	1840	1224
952	5276	1708	5389	5263	1707	1086	5302	5337	5366	2733	1923	1230
954	5309	1766	5490	5255	1724	1094	5374	5313	5441	2722	1846	1242
956	5238	1745	5276	5391	1732	1102	5257	5327	5311	2778	1912	1260
958	5319	1722	5344	5279	1676	1052	5315	5356	5359	2759	1875	1295
960	5239	1731	5374	5359	1710	1069	5279	5420	5353	2737	1848	1230
962	5325	1692	5336	5313	1701	1074	5284	5346	5341	2724	1865	1226
964	5318	1712	5320	5421	1716	1084	5288	5352	5346	2780	1869	1257
966	5214	1720	5524	5429	1659	1069	5309	5359	5283	2793	1805	1244
968	5225	1729	5451	5402	1696	1106	5185	5361	5400	2774	1838	1290
970	5253	1737	5424	5257	1713	1077	5323	5281	5318	2749	1891	1269
972	5277	1757	5357	5300	1717	1078	5256	5332	5300	2701	1899	1269
974	5311	1779	5411	5319	1758	1086	5270	5448	5312	2746	1892	1229
976	5302	1743	5320	5403	1718	1083	5267	5360	5397	2701	1901	1222
978	5380	1740	5333	5388	1687	1093	5308	5368	5253	2749	1915	1291
980	5329	1733	5407	5404	1705	1107	5253	5385	5334	2840	1855	1250
982	5231	1738	5487	5339	1729	1077	5235	5381	5427	2772	1884	1232
984	5324	1731	5440	5392	1688	1102	5219	5436	5364	2776	1868	1222
986	5305	1717	5458	5354	1732	1078	5393	5388	5288	2857	1912	1244
988	5196	1736	5402	5365	1719	1095	5192	5323	5329	2758	1917	1255
990	5328	1761	5406	5295	1735	1080	5296	5312	5341	2793	1904	1250
992	5280	1792	5412	5296	1755	1079	5368	5359	5342	2785	1820	1239
994	5242	1760	5373	5322	1720	1074	5227	5255	5341	2743	1894	1271
996	5288	1716	5342	5332	1734	1060	5185	5491	5317	2823	1921	1268
998	5301	1789	5432	5340	1708	1104	5308	5237	5376	2811	1867	1251
1000	5294	1747	5408	5335	1703	1103	5225	5350	5331	2763	1894	1259
1002	5255	1793	5400	5375	1696	1094	5294	5353	5448	2768	1898	1281
1004	5253	1735	5359	5379	1722	1095	5225	5384	5384	2744	1945	1234
1006	5243	1719	5340	5313	1695	1082	5335	5394	5350	2716	1860	1269
1008	5235	1739	5329	5345	1748	1094	5263	5377	5351	2833	1908	1246
1010	5253	1768	5473	5283	1697	1090	5324	5328	5400	2777	1874	1260
1012	5247	1740	5421	5281	1767	1096	5275	5299	5321	2764	1880	1263
1014	5263	1795	5228	5256	1709	1130	5278	5277	5346	2821	1920	1272
1016	5187	1785	5447	5328	1717	1123	5168	5320	5380	2770	1912	1270
1018	5222	1741	5392	5208	1705	1080	5300	5319	5296	2768	1926	1265
1020	5272	1791	5399	5307	1698	1120	5293	5402	5366	2838	1851	1280
1022	5302	1756	5413	5282	1700	1122	5347	5443	5335	2776	1929	1309
2. y2 (fluorophore: ATTO488)
Time (minutes)	sample 1	sample 2	sample 3	sample 4	sample 5	sample 6	sample 7	sample 8	sample 9	sample 10	sample 11	sample 12	sample 13	sample 14	sample 15	sample 16	sample 17	sample 18	sample 19	sample 20	sample 21	sample 22	sample 23	sample 24	sample 25	sample 26	sample 27	sample 28	sample 29	sample 30
0	2589	2598	2597	2594	2608	2613	2649	2595	2543	2668	2703	2575	2413	2425	2433	2418	2442	2429	2472	2417	2537	2495	2418	2433	2364	2442	2468	2465	2373	2438
2	2667	2893	2718	2632	2847	2885	2820	2752	2656	2876	2950	2759	2404	2456	2513	2523	2637	2671	2445	2449	2544	2583	2538	2572	2436	2444	2478	2435	2487	2547
4	2874	3166	2806	2812	3237	3130	3001	2839	2722	3244	3297	2891	2520	2549	2677	2715	2970	2944	2453	2547	2681	2608	2760	2850	2480	2502	2682	2556	2706	2780
6	2938	3595	2954	2779	3705	3555	3287	3071	2872	3662	3647	3264	2550	2680	2867	2902	3189	3311	2432	2494	2741	2709	2899	3097	2453	2678	2860	2644	2903	3113
8	3098	4206	3057	2874	4098	3984	3466	3187	2888	4097	4029	3610	2496	2634	2995	3257	3544	3786	2485	2459	2843	2824	3169	3390	2488	2772	3096	2777	3051	3333
10	3217	4587	3229	2941	4548	4462	3583	3320	2978	4547	4385	3906	2479	2721	3128	3374	3813	4213	2540	2557	2963	2946	3423	3737	2514	2834	3221	2907	3266	3620
12	3251	4976	3292	2983	5080	4730	3771	3502	3074	5018	4793	4193	2507	2809	3201	3646	4156	4492	2530	2535	2955	3000	3641	4111	2524	3009	3341	3061	3454	3960
14	3397	5542	3330	3070	5391	5183	3881	3477	3036	5224	5143	4515	2534	2848	3432	4005	4545	4739	2553	2602	3002	3132	3972	4273	2559	2956	3396	3126	3674	4182
16	3515	5844	3424	3039	5804	5580	4115	3578	3116	5601	5410	4852	2540	2929	3507	4149	4782	5133	2533	2581	3046	3233	4061	4651	2584	3062	3629	3202	3782	4408
18	3589	6153	3617	3092	6144	5938	4239	3646	3135	6037	5851	5074	2579	2897	3547	4446	5146	5396	2541	2675	3049	3295	4434	4928	2610	3147	3670	3291	3978	4606
20	3690	6567	3647	3110	6549	6268	4413	3805	3261	6254	6099	5371	2566	2943	3605	4613	5403	5725	2607	2619	3041	3438	4633	5235	2563	3125	3761	3402	4157	4850
22	3695	6873	3748	3186	6898	6654	4451	3848	3222	6675	6371	5622	2563	3014	3651	4708	5730	6011	2574	2633	3157	3487	4844	5501	2631	3232	3801	3483	4229	4909
24	3801	7232	3850	3159	7165	6918	4527	3894	3247	6954	6695	5914	2594	2946	3816	5031	5780	6332	2587	2584	3228	3623	5148	5700	2547	3212	4027	3527	4355	5308
26	3884	7445	3814	3216	7524	7248	4704	3915	3275	7134	7040	6015	2547	3068	3816	5280	6162	6565	2611	2619	3133	3688	5248	5963	2660	3229	4021	3687	4582	5304
28	3944	7824	3915	3349	7797	7617	4779	3993	3383	7438	7227	6327	2586	3082	3802	5497	6453	6745	2570	2675	3237	3730	5431	6169	2648	3316	4087	3748	4723	5564
30	3977	7965	3974	3276	7987	7780	4929	4013	3379	7573	7350	6433	2588	3193	3900	5656	6614	7034	2617	2730	3239	3819	5727	6427	2648	3247	4140	3813	4819	5790
32	3979	8292	3942	3273	8244	7998	4989	4126	3414	7734	7671	6640	2616	3139	4066	5836	6880	7190	2657	2645	3275	3837	5951	6642	2610	3321	4216	3877	5052	5858
34	4015	8584	3957	3343	8545	8319	5041	4197	3405	8012	7737	7005	2577	3193	3966	6004	7027	7416	2627	2691	3236	3925	6074	6783	2696	3313	4273	3916	4953	5956
36	4015	8758	4104	3350	8957	8616	5153	4180	3481	8178	7815	7137	2599	3148	4022	6141	7382	7516	2669	2627	3289	3962	6228	7035	2609	3407	4340	4010	5195	6108
38	4070	9088	4187	3451	8856	8778	5280	4237	3456	8351	8229	7190	2645	3219	4173	6319	7444	7878	2624	2707	3311	4004	6435	7255	2705	3414	4328	4113	5243	6306
40	4128	9207	4201	3234	9307	9094	5290	4269	3476	8416	8333	7396	2622	3204	4141	6537	7781	7915	2637	2717	3392	4140	6556	7480	2659	3423	4429	4133	5385	6412
42	4250	9217	4237	3316	9339	9177	5334	4361	3519	8729	8447	7638	2612	3241	4247	6704	7844	8177	2625	2653	3372	4122	6776	7681	2652	3446	4498	4273	5339	6538
44	4255	9635	4189	3363	9681	9440	5373	4377	3532	8862	8638	7809	2661	3286	4180	6688	7971	8370	2655	2732	3348	4191	7072	7744	2679	3445	4525	4292	5661	6606
46	4259	9913	4240	3363	9781	9657	5410	4302	3540	8891	8871	7921	2640	3262	4315	6949	8373	8281	2699	2673	3316	4177	7256	7940	2678	3486	4540	4304	5787	6713
48	4169	9988	4277	3329	9998	9792	5498	4330	3414	9324	8977	8191	2591	3332	4319	7286	8463	8682	2716	2741	3383	4349	7341	8111	2738	3508	4570	4514	5714	6815
50	4297	10126	4366	3408	10206	9992	5666	4494	3602	9194	9027	8150	2689	3242	4313	7318	8524	8846	2670	2685	3352	4464	7482	8317	2735	3419	4667	4465	5854	6958
52	4257	10277	4435	3373	10449	10134	5722	4538	3535	9458	9390	8454	2634	3339	4380	7441	8542	8945	2746	2704	3411	4407	7558	8396	2711	3536	4643	4518	6007	7070
54	4416	10611	4375	3420	10569	10124	5639	4505	3494	9505	9445	8546	2700	3308	4355	7661	8917	9006	2689	2687	3365	4408	7763	8488	2725	3546	4659	4559	6078	7102
56	4337	10704	4413	3472	10668	10492	5651	4464	3525	9770	9492	8687	2667	3321	4405	7727	9125	9220	2758	2669	3339	4467	7909	8604	2738	3512	4680	4526	6059	7330
58	4465	10737	4483	3405	10845	10644	5846	4477	3545	9858	9612	8733	2687	3379	4518	7797	9245	9318	2686	2748	3400	4711	8035	8789	2745	3580	4692	4622	6209	7360
60	4475	10903	4360	3534	10862	10881	5777	4583	3530	9786	9762	9023	2671	3346	4430	7967	9274	9540	2683	2719	3407	4630	8157	8930	2699	3505	4795	4777	6326	7366
62	4431	11058	4448	3403	11024	11044	5858	4560	3571	10011	9912	9078	2693	3419	4436	8062	9542	9599	2738	2734	3418	4700	8313	9091	2748	3574	4847	4784	6376	7479
64	4463	11247	4513	3454	11133	11142	6016	4603	3601	10105	9977	9037	2712	3338	4454	8233	9762	9840	2704	2798	3413	4660	8471	9321	2788	3565	4831	4954	6523	7660
66	4434	11372	4525	3557	11341	11239	5970	4544	3561	10343	10175	9334	2676	3374	4632	8369	9776	9855	2753	2704	3501	4864	8560	9228	2729	3609	4819	4927	6558	7703
68	4443	11576	4495	3526	11460	11481	5973	4620	3602	10347	10241	9451	2633	3388	4536	8551	9888	9984	2689	2771	3420	4854	8628	9548	2718	3572	4772	4980	6529	7750
70	4513	11489	4633	3492	11613	11464	5955	4559	3604	10518	10371	9492	2744	3397	4556	8587	10096	10186	2729	2738	3488	4878	8724	9561	2738	3594	4842	5013	6649	7838
72	4538	11692	4561	3546	11770	11600	6109	4600	3576	10493	10503	9767	2693	3395	4591	8715	10111	10294	2818	2744	3466	4875	8799	9664	2701	3634	5007	5039	6694	7926
74	4483	11919	4528	3551	11793	11862	6052	4684	3695	10668	10510	9613	2723	3422	4666	8797	10266	10410	2727	2823	3380	5052	8916	9728	2767	3587	4945	5086	6926	8059
76	4578	11947	4545	3513	11906	11907	6281	4766	3663	10724	10627	9806	2772	3457	4659	8836	10449	10396	2790	2782	3440	5037	9075	9790	2830	3746	4951	5123	6860	8085
78	4598	12080	4554	3486	12125	11943	6269	4742	3578	10762	10836	10062	2674	3476	4621	8994	10497	10514	2699	2841	3471	5146	9182	9920	2789	3615	4962	5192	6962	8090
80	4575	12172	4602	3586	12143	12146	6317	4696	3642	10984	10787	10102	2703	3454	4722	9269	10514	10611	2769	2782	3398	5114	9323	10065	2812	3654	4990	5304	7038	8200
82	4576	12068	4527	3457	12159	12137	6355	4738	3614	11139	10981	10140	2665	3440	4727	9123	10600	10643	2799	2842	3474	5102	9451	10233	2844	3654	5165	5329	7048	8152
84	4612	12385	4658	3508	12362	12126	6254	4725	3615	11152	11128	10258	2718	3495	4689	9314	10862	10802	2787	2785	3527	5162	9672	10404	2789	3706	5109	5368	7074	8336
86	4803	12478	4674	3581	12402	12437	6332	4758	3712	11146	11176	10206	2798	3576	4767	9440	10825	10843	2833	2885	3509	5235	9774	10329	2806	3688	5095	5429	7230	8426
88	4681	12485	4769	3561	12472	12543	6450	4681	3607	11421	11209	10327	2746	3447	4829	9502	10950	10907	2755	2758	3492	5249	9666	10453	2732	3651	5121	5287	7382	8535
90	4720	12419	4821	3569	12711	12708	6433	4793	3653	11487	11480	10572	2764	3544	4766	9696	11072	11111	2779	2793	3484	5184	9832	10579	2833	3665	5097	5460	7280	8590
92	4719	12824	4658	3498	12864	12685	6507	4844	3624	11333	11419	10709	2780	3446	4733	9720	11330	11263	2743	2772	3481	5305	9872	10694	2866	3688	5165	5526	7301	8660
94	4748	12828	4760	3599	12726	12592	6572	4890	3671	11626	11535	10773	2733	3483	4935	9761	11301	11304	2807	2796	3472	5363	10057	10660	2792	3719	5099	5467	7389	8688
96	4695	12826	4717	3570	12744	12897	6489	4904	3677	11619	11518	10839	2733	3458	4911	9841	11410	11184	2850	2804	3529	5488	10145	10865	2771	3728	5137	5633	7519	8697
98	4792	12886	4746	3481	12971	12783	6548	4787	3700	11605	11760	11013	2804	3478	4941	10012	11360	11488	2779	2829	3531	5378	10349	10851	2794	3660	5191	5629	7518	8947
100	4644	12913	4784	3560	13064	13054	6567	4873	3674	11725	11856	11024	2778	3444	4926	9944	11528	11477	2775	2819	3453	5525	10192	10973	2837	3728	5272	5601	7559	8760
102	4712	13027	4852	3538	13042	13181	6561	4903	3681	11879	11795	11246	2753	3540	4864	9997	11570	11679	2788	2844	3545	5480	10487	11223	2804	3733	5234	5719	7677	8843
104	4813	13239	4847	3555	13284	13192	6565	4785	3641	11947	11934	11276	2734	3610	4905	10129	11786	11768	2738	2901	3631	5651	10522	11261	2843	3742	5218	5783	7686	9070
106	4846	13319	4796	3586	13158	13154	6683	4845	3765	11934	12067	11477	2771	3584	4849	10283	11822	11764	2793	2917	3520	5616	10598	11313	2862	3731	5314	5744	7824	8964
108	4859	13071	4945	3595	13272	13312	6569	5010	3783	12092	11995	11457	2705	3519	4976	10484	11842	11830	2841	2821	3594	5604	10695	11409	2831	3750	5374	5849	7942	9110
110	4798	13341	4890	3561	13487	13366	6613	4906	3810	11947	12167	11473	2819	3568	4981	10522	12049	11795	2845	2822	3511	5612	10731	11325	2840	3791	5318	5917	7925	9162
112	4825	13349	4893	3573	13498	13439	6724	4977	3707	12267	12275	11467	2798	3619	5029	10504	12070	11952	2833	2860	3548	5615	10787	11560	2904	3833	5377	5939	7938	9192
114	4759	13381	4926	3538	13639	13396	6801	4916	3740	12192	12329	11476	2809	3565	4877	10428	12130	11948	2809	2846	3538	5776	10827	11605	2902	3792	5430	6012	8041	9392
116	4856	13348	4914	3580	13558	13585	6705	4937	3658	12166	12410	11666	2755	3562	4966	10522	12250	12224	2880	2834	3559	5797	10930	11642	2769	3868	5291	5994	8022	9374
118	4889	13590	4837	3623	13698	13567	6781	4898	3717	12285	12276	11606	2730	3570	4926	10718	12255	12217	2700	2823	3551	5717	10964	11653	2871	3867	5405	6124	8091	9332
120	4777	13679	4903	3614	13550	13716	6812	5056	3784	12445	12499	11797	2846	3503	5018	10893	12474	12291	2805	2855	3616	5723	10995	11703	2887	3805	5397	6199	8255	9318
122	4842	13611	4929	3646	13460	13759	6789	5004	3728	12383	12417	11880	2733	3642	4999	10837	12442	12350	2785	2833	3597	5814	11244	11872	2796	3780	5322	6069	8146	9627
124	4884	13716	4924	3620	13724	13693	6751	4936	3710	12593	12713	12054	2789	3574	5024	11041	12429	12413	2807	2905	3583	5911	11151	11843	2831	3834	5377	6131	8265	9483
126	4778	13819	4982	3637	13929	13878	6901	4960	3700	12570	12732	12116	2812	3593	4900	10927	12696	12549	2835	2911	3645	6010	11141	11923	2884	3855	5416	6243	8261	9665
128	4972	13781	4891	3683	13881	14084	6757	4981	3797	12588	12751	12194	2783	3595	5038	11053	12609	12388	2792	2852	3634	6001	11384	12185	2964	3804	5455	6145	8284	9739
130	4859	13703	5055	3585	13987	13998	6797	5047	3764	12702	12636	12122	2775	3640	5076	11033	12731	12471	2857	2848	3604	6036	11359	11968	2838	3966	5452	6202	8520	9748
132	4959	13878	5036	3691	13955	13949	6922	5128	3815	12656	12777	12309	2810	3641	5072	11269	12895	12539	2781	2873	3610	5997	11485	12085	2834	3829	5571	6309	8453	9790
134	4896	13913	4965	3604	14108	14112	6798	5108	3755	12845	12943	12192	2762	3609	4995	11268	12873	12759	2899	2938	3617	5939	11619	12096	2924	3852	5598	6500	8504	9698
136	4982	14000	5021	3628	14273	14083	7004	5024	3813	12560	13052	12378	2928	3662	5016	11426	12716	12694	2848	2929	3639	6079	11638	12223	2849	3863	5454	6355	8513	9900
138	5025	13900	5091	3687	14089	14080	6876	5090	3775	12742	12904	12600	2822	3635	5083	11499	12934	12681	2850	2893	3582	5988	11606	12338	2968	3933	5573	6465	8633	9744
140	4967	14031	5029	3630	14168	14222	7041	5076	3766	12759	13018	12679	2750	3650	5050	11462	12966	12723	2872	2915	3680	6229	11754	12444	2942	3946	5524	6459	8544	9795
142	4875	14012	5152	3661	14208	14373	6962	5078	3804	12822	12958	12604	2817	3544	5165	11454	12969	12829	2857	2857	3609	6070	11663	12457	2889	3875	5521	6499	8701	10088
144	4989	14289	5104	3641	14319	14129	7070	5183	3768	12877	13069	12566	2810	3718	5170	11475	13307	12904	2852	2994	3579	6263	11839	12514	2893	3903	5588	6635	8774	10015
146	4943	14234	5033	3708	14272	14264	7071	5162	3792	12887	13350	12750	2817	3605	5210	11587	13110	12948	2825	2908	3662	6289	12023	12542	2916	3895	5627	6565	8871	10038
148	4931	14229	5090	3742	14164	14347	7095	5127	3826	13022	13108	12775	2796	3610	5117	11781	13111	12883	2889	2944	3609	6237	11936	12874	2911	3962	5703	6546	8767	10001
150	4939	14406	4984	3664	14280	14357	7184	5157	3863	13028	13202	12724	2815	3674	5143	11773	13139	13011	2842	2885	3638	6282	12018	12573	2907	3961	5638	6761	8814	10154
152	4976	14389	5144	3752	14381	14432	7131	5141	3750	13036	13275	12898	2813	3699	5121	11628	13227	13027	2864	2861	3622	6315	12016	12794	2878	3845	5750	6713	8881	10178
154	5039	14467	5024	3696	14196	14450	7064	5084	3822	13139	13506	12800	2893	3717	5206	11847	13549	12863	2896	2851	3644	6373	12065	12741	2987	4003	5680	6660	8831	10196
156	5001	14382	5169	3644	14405	14510	7172	5126	3817	13081	13445	12822	2825	3723	5207	11984	13299	13026	2888	2913	3680	6390	12178	12667	2873	3952	5645	6786	8995	10308
158	5078	14421	5070	3706	14506	14443	7310	5206	3792	13333	13275	12926	2799	3683	5326	11925	13372	13197	2824	2906	3656	6453	12120	12893	2977	3940	5748	6878	9100	10238
160	4984	14566	5152	3767	14498	14511	7086	5154	3882	13166	13202	12862	2802	3723	5147	11965	13505	13236	2812	2887	3646	6499	12270	12882	2871	3937	5687	6730	9136	10319
162	4899	14649	5129	3717	14595	14788	7281	5103	3773	13162	13280	13236	2878	3630	5188	11917	13544	13175	2886	2964	3655	6448	12176	12988	2919	4041	5711	6934	9118	10401
164	4978	14523	5129	3701	14481	14516	7345	5106	3779	13316	13250	13142	2809	3637	5208	12068	13756	13233	2905	2942	3600	6375	12264	13119	2869	3908	5689	6842	9168	10314
166	4977	14875	5212	3671	14643	14826	7173	5224	3922	13356	13398	13304	2829	3699	5261	11927	13677	13475	2831	2922	3708	6692	12409	12986	2892	3933	5795	7003	9127	10541
168	4999	14702	5183	3699	14640	14569	7388	5152	3845	13128	13468	13267	2793	3723	5152	12148	13668	13432	2921	2949	3641	6624	12540	12871	2972	3940	5731	7036	9323	10410
170	5078	14855	5165	3782	14505	14615	7265	5138	3815	13276	13360	13173	2862	3636	5201	12171	13804	13304	2836	2887	3688	6563	12458	13099	2881	3960	5776	6988	9278	10494
172	5054	14739	5232	3709	14739	14623	7220	5165	3909	13445	13489	13381	2816	3706	5200	12311	13567	13379	2890	2877	3734	6769	12747	13292	2920	3965	5840	7050	9441	10728
174	5071	14741	5094	3782	14634	14499	7253	5291	4001	13330	13437	13481	2872	3708	5343	12377	13852	13490	2891	2974	3695	6653	12519	13200	2977	4033	5899	7116	9431	10644
176	4981	14949	5180	3696	14860	14797	7269	5190	3824	13419	13448	13271	2859	3729	5197	12333	13737	13512	2902	2961	3751	6618	12521	13251	2944	4022	5736	7112	9412	10746
178	5029	14821	5180	3744	14847	14787	7288	5192	3843	13515	13230	13545	2882	3755	5457	12451	13924	13456	2876	3012	3685	6832	12783	13203	2957	4017	5850	7243	9516	10723
180	5038	14887	5197	3750	14878	14820	7192	5194	3777	13489	13252	13791	2851	3786	5302	12412	13867	13595	2894	2974	3771	6809	12823	13462	2965	3994	5799	7169	9444	10730
182	5058	14728	5187	3740	14832	14931	7335	5224	3908	13634	13381	13592	2888	3745	5287	12519	13807	13653	2897	2967	3723	6736	12686	13325	2994	3979	5864	7150	9613	10791
184	5076	15040	5160	3675	14815	14727	7452	5229	3889	13662	13434	13604	2880	3600	5420	12638	13956	13744	2889	2993	3710	6855	12882	13312	2879	4084	5857	7353	9539	10702
186	5048	15363	5177	3761	14830	14692	7338	5267	3866	13629	13415	13641	2952	3724	5306	12721	13971	13790	2856	2972	3722	6933	13042	13548	2942	4088	5861	7378	9600	10875
188	5100	15026	5180	3715	14924	14979	7402	5267	3843	13675	13495	13674	2920	3774	5402	12405	14045	13717	2911	2951	3674	6800	12963	13420	2978	4113	5930	7268	9743	10876
190	5159	15144	5279	3702	14769	14994	7422	5332	3870	13546	13735	13618	2927	3717	5386	12777	14173	13620	2910	3029	3707	6836	13007	13407	2994	4049	5912	7387	9562	10933
192	5106	15112	5214	3826	15114	14866	7466	5256	3877	13709	13303	13659	2923	3780	5473	12791	14370	13838	2945	2972	3688	6929	12860	13543	3025	4091	5965	7412	9714	10888
194	5105	15050	5275	3755	15131	15003	7438	5309	3822	13768	13559	13770	2890	3732	5341	12862	14164	13818	2941	2942	3743	6895	13187	13528	3011	4054	5923	7365	9628	10959
196	5153	15212	5256	3748	15010	14976	7371	5205	3860	13887	13536	13853	2842	3823	5449	12925	14207	14030	2966	3017	3797	7026	13046	13542	2917	4130	6008	7454	9592	10928
198	5153	14990	5291	3747	15113	14983	7396	5322	3894	13806	13779	13884	2899	3815	5351	12977	14425	13954	2901	2985	3684	6965	13185	13652	2975	4139	5989	7600	9832	11021
200	5143	15242	5302	3663	14961	15146	7361	5306	3825	13863	13547	13783	2852	3772	5355	13124	14351	13962	2901	3037	3707	7096	13063	13788	3038	4069	5954	7629	9759	11052
202	5149	15326	5192	3838	15057	15192	7496	5338	3776	13872	13682	13875	2944	3737	5442	12868	14512	14007	2940	2914	3864	7011	13127	13601	2991	4137	6010	7680	9985	11124
204	5118	15126	5238	3830	15098	15008	7539	5316	3897	13852	13736	13800	2938	3802	5381	12909	14274	14011	2932	2969	3678	7113	13465	13872	2970	4159	5991	7731	9955	11056
206	5123	15117	5331	3751	15042	15085	7536	5233	3886	13880	13826	13941	2900	3782	5349	13006	14295	14194	2911	3006	3824	7224	13213	13752	3037	4182	5931	7690	9951	11250
208	5164	15285	5319	3790	15136	15116	7553	5362	3962	13953	13653	14158	2904	3882	5376	12792	14285	14264	2906	2972	3732	7162	13336	13825	2977	4243	6091	7622	10016	11025
210	5121	15439	5331	3876	15238	15458	7518	5302	3904	14079	13863	14027	2917	3839	5453	13165	14515	14180	2960	2963	3723	7109	13331	13957	3056	4156	5993	7732	10187	11280
212	5226	15154	5424	3787	15102	15275	7639	5266	3920	13993	13940	14141	2910	3803	5467	13110	14528	14152	2899	2999	3712	7125	13413	13990	3061	4165	6000	7816	10164	11197
214	5196	15275	5411	3708	15174	15234	7513	5298	3777	14166	13798	14015	3065	3808	5437	13231	14599	14096	2936	3014	3782	7274	13524	13849	3000	4182	6102	7754	9979	11304
216	5171	15283	5326	3765	15323	15334	7576	5330	3832	14109	13809	14222	2904	3733	5474	13138	14559	14441	2931	3044	3764	7378	13523	14052	2964	4097	6094	7702	10064	11275
218	5263	15276	5380	3826	15477	15290	7597	5263	3945	13926	13800	14168	2950	3814	5474	13208	14443	14363	2925	3041	3822	7324	13456	14109	3068	4198	6204	7973	10236	11274
220	5192	15342	5375	3808	15173	15268	7584	5400	4036	14084	13879	14309	2970	3791	5597	13130	14515	14282	2937	2935	3752	7331	13543	14100	3088	4135	6102	7801	10385	11264
222	5258	15330	5298	3766	15148	15288	7548	5373	3894	14220	14245	14295	2965	3893	5604	13366	14680	14384	2925	2952	3715	7259	13616	13914	3097	4135	6203	7955	10314	11414
224	5233	15149	5414	3776	15372	15280	7658	5247	3953	14353	14108	14120	2923	3829	5557	13308	14570	14172	3003	2954	3765	7327	13654	14080	2999	4198	6177	7927	10237	11347
226	5218	15372	5346	3698	15305	15272	7550	5336	4009	14158	14080	14260	2963	3764	5540	13436	14708	14251	3014	2981	3788	7343	13499	14017	3067	4221	6210	7922	10317	11577
228	5309	15522	5419	3845	15285	15393	7612	5329	3886	14144	14087	14323	2977	3884	5492	13392	14630	14237	2982	3019	3754	7327	13647	13963	3167	4173	6128	8013	10375	11533
230	5296	15504	5308	3823	15351	15390	7625	5306	3934	14102	14228	14256	2906	3828	5517	13326	14695	14418	3012	3058	3799	7336	14018	14184	3032	4197	6199	8098	10337	11548
232	5270	15429	5491	3845	15183	15292	7733	5453	3919	14380	14361	14477	2918	3872	5622	13504	14660	14550	2947	2958	3797	7402	13831	14118	3072	4267	6132	8002	10529	11629
234	5283	15474	5373	3824	15262	15552	7611	5334	3900	14364	14188	14261	2943	3840	5448	13274	14734	14462	3000	3038	3802	7457	13773	13874	3027	4224	6208	8126	10340	11599
236	5208	15619	5386	3907	15442	15531	7699	5476	3885	14293	14312	14326	2955	3922	5593	13638	14834	14479	2964	2988	3797	7502	13632	13953	3031	4212	6215	8175	10466	11659
238	5238	15365	5459	3837	15355	15444	7826	5468	3975	14356	14209	14420	2911	3867	5569	13504	14973	14441	2911	3023	3759	7583	13820	14248	3098	4167	6151	8167	10554	11750
240	5235	15431	5445	3770	15343	15567	7586	5380	3946	14197	14369	14603	2950	3865	5699	13523	14729	14575	2958	3045	3784	7381	13783	14273	3053	4236	6142	8135	10404	11800
242	5328	15688	5507	3849	15483	15679	7762	5358	3968	14467	14375	14564	3002	3839	5621	13444	14942	14594	2965	3034	3785	7569	13897	14351	3087	4250	6203	8141	10450	11589
244	5257	15437	5463	3793	15577	15500	7789	5385	3940	14517	14416	14417	3055	3936	5724	13733	14846	14521	3000	2948	3834	7467	13717	14287	3046	4129	6160	8316	10506	11558
246	5216	15533	5374	3784	15524	15403	7788	5417	3957	14491	14508	14609	2952	3908	5604	13591	14872	14527	3023	3088	3847	7595	13932	14424	3071	4218	6336	8413	10731	11636
248	5303	15641	5374	3852	15389	15531	7838	5418	3979	14289	14344	14496	2973	3858	5651	13456	14941	14648	2996	3010	3832	7626	14065	14287	3132	4279	6394	8180	10632	11752
250	5363	15549	5426	3854	15438	15502	7735	5366	3957	14438	14434	14594	2963	3882	5554	13652	15073	14544	2944	3087	3789	7638	14056	14328	3112	4240	6366	8334	10702	11786
252	5270	15556	5423	3861	15421	15586	7745	5533	3940	14195	14629	14663	3006	3857	5622	13861	15051	14562	2932	3106	3832	7668	14234	14288	3026	4214	6351	8293	10589	11973
254	5320	15651	5556	3812	15723	15463	7726	5428	3878	14583	14449	14771	2933	3851	5680	13920	15041	14504	2982	3019	3893	7649	13953	14680	3083	4322	6193	8454	10733	11859
256	5283	15658	5505	3831	15676	15749	7767	5550	3937	14625	14412	14725	2957	4006	5666	13785	15112	14617	3024	3069	3834	7671	14241	14672	3120	4262	6156	8374	10792	11789
258	5263	15472	5439	3902	15561	15503	7908	5396	3983	14436	14679	14745	3048	3832	5634	13817	15232	14738	3044	2958	3850	7769	14073	14549	3065	4126	6279	8523	10802	11828
260	5306	15745	5556	3824	15645	15668	7771	5529	3955	14643	14641	14635	2935	3923	5788	13773	14976	14708	2947	3072	3867	7653	14190	14719	3064	4262	6346	8479	10792	11668
262	5358	15837	5496	3746	15567	15490	7858	5388	3955	14581	14791	14918	2948	3959	5646	13992	15109	14617	2985	3044	3777	7758	14109	14577	3129	4269	6397	8386	10828	11779
264	5334	15685	5487	3886	15513	15535	7933	5507	3989	14479	14513	14874	2982	3896	5702	13861	15065	14778	2950	3078	3837	7865	14178	14561	3010	4287	6311	8548	10798	11907
266	5344	15586	5457	3834	15517	15677	7868	5342	4014	14455	14449	14753	3019	3944	5639	13965	15137	14596	3008	3064	3869	7905	14216	14526	3080	4256	6319	8567	10925	11962
268	5371	15687	5456	3827	15602	15556	7876	5391	4007	14637	14610	14785	2966	3905	5684	13858	15210	14704	3055	3029	3898	7826	14331	14810	3071	4296	6377	8612	10786	12068
270	5427	15683	5522	3846	15837	15714	7851	5551	3994	14548	14743	14843	3002	3855	5675	14055	15264	14868	2992	3075	3891	7858	14255	14566	3021	4368	6521	8663	10907	12156
272	5363	15559	5449	3857	15632	15686	7898	5562	3876	14584	14673	14829	2894	4020	5569	14050	15253	14780	3044	3070	3884	7897	14221	14666	3186	4308	6341	8598	10922	12035
274	5286	15702	5531	3827	15616	15724	8017	5496	3991	14601	14831	14849	3028	3900	5629	13963	15306	14794	2961	3027	3840	7938	14399	14752	3105	4280	6473	8635	10900	12116
276	5299	15866	5523	3821	15687	15808	7891	5549	3947	14518	14778	14861	3002	3884	5588	14107	15420	14836	2999	3077	3888	7886	14380	14730	3122	4391	6423	8799	11151	12170
278	5319	15808	5485	3878	15722	15656	7809	5590	3988	14617	14822	14845	3014	3951	5686	14135	15306	14945	3061	3069	3856	7930	14529	14656	3148	4329	6397	8758	10937	12165
280	5343	15892	5537	3845	15701	15692	7918	5428	3962	14816	14700	14782	3054	3908	5647	14352	15305	14898	2988	3070	3865	7933	14531	14964	3085	4220	6432	8760	10999	12292
282	5340	15717	5591	3884	15718	15767	8022	5453	3947	14842	14831	14882	3030	3957	5630	14211	15141	14968	3055	3100	3811	7979	14465	14758	3052	4265	6429	8675	11053	12139
284	5318	15958	5613	3944	15800	15728	7915	5485	4023	14739	14932	14959	2912	3956	5836	14095	15442	15125	2949	3059	3882	8171	14460	14879	3150	4265	6482	8734	11067	12035
286	5357	15702	5503	3873	15788	15783	7984	5526	4008	14816	14769	15037	2970	4044	5765	14106	15260	15022	3006	3134	3846	8119	14617	14789	3117	4420	6455	8836	11007	11990
288	5513	15555	5653	3907	15896	15796	7974	5554	4080	15027	14742	14951	2944	4038	5720	14195	15280	15119	3106	3102	3858	8014	14691	14696	3092	4332	6487	8873	11030	12132
290	5306	15664	5598	3828	15833	15669	8137	5474	4041	14609	14986	15077	3012	4034	5774	14289	15299	15031	3026	3111	3927	8274	14430	14800	3062	4357	6631	8865	11312	12180
292	5376	15829	5530	3875	15691	15624	8039	5501	4012	14981	14847	15041	3000	3965	5768	14256	15283	15137	3093	3128	3915	8224	14781	14821	3093	4434	6589	9026	11249	12331
294	5389	15758	5570	3950	15612	15690	8020	5466	3965	14854	14951	15112	2981	4004	5738	14432	15349	15047	3010	3073	3884	8203	14536	14817	3091	4339	6422	9028	11088	12275
296	5313	15764	5672	3931	15703	15886	8099	5516	4041	14813	14875	15042	3068	3926	5782	14252	15423	15060	3033	3038	3843	8187	14712	14959	3120	4402	6605	9035	11292	12354
298	5405	15899	5529	3918	15749	15756	8110	5477	4015	14787	14902	15091	2947	4050	5807	14130	15499	14998	3033	3116	3944	8251	14727	14893	3179	4276	6479	8988	11298	12495
300	5486	15920	5601	3894	15668	15765	8048	5581	3990	14704	14948	15135	3026	4085	5890	14448	15353	15090	3068	3094	3915	8246	14442	14819	3186	4435	6522	9059	11311	12403
302	5375	15770	5642	3842	15832	15505	8250	5564	4083	14961	14977	15176	2970	3938	5684	14306	15327	15144	3109	3017	3957	8205	14494	14765	3155	4398	6509	9068	11439	12236
304	5392	15824	5633	3984	15680	15903	8060	5640	3955	14982	14870	15015	3010	3989	5911	14341	15602	15254	3023	3034	3922	8339	14663	15038	3094	4422	6474	9113	11316	12256
306	5432	15916	5651	3910	15762	15745	8011	5553	3885	14836	14941	15093	2989	4012	5773	14491	15393	15282	3099	3113	3908	8176	14783	14933	3086	4424	6673	9139	11234	12294
308	5521	15902	5599	3920	15794	15851	7980	5592	4040	14877	15178	15132	3007	4061	5881	14454	15648	15110	3093	3135	3936	8312	14852	14909	3190	4395	6631	9028	11553	12283
310	5348	15878	5665	4019	16102	15772	8030	5534	4041	14842	14897	15222	3006	3940	5773	14559	15527	15098	3085	3123	3954	8447	14785	15075	3163	4440	6608	9180	11372	12414
312	5358	15872	5564	3848	15780	15736	7927	5607	4033	14907	15012	15161	3020	4052	5805	14536	15406	15211	2981	3097	3921	8347	14584	14873	3181	4420	6592	9151	11472	12273
314	5400	15944	5705	3946	15916	15831	8108	5585	4049	15104	15094	15242	3044	4045	5881	14483	15592	15334	3003	3134	3960	8316	14656	15082	3147	4356	6627	9204	11402	12561
316	5444	15930	5565	3877	15778	15893	8201	5596	3968	14997	15226	15220	2983	4015	5795	14417	15718	15203	3107	3116	4011	8488	14883	15175	3086	4437	6626	9179	11409	12442
318	5421	15827	5706	3968	15664	15797	8119	5638	4024	15046	15160	15247	3040	4089	5870	14570	15716	15178	3024	3110	3965	8388	14759	14849	3165	4485	6438	9231	11386	12558
320	5479	16041	5700	3972	15865	15831	7951	5634	4067	14910	15129	15293	3040	3942	5970	14528	15507	15276	3082	3107	3934	8353	14747	15018	3171	4452	6727	9311	11623	12636
322	5354	15767	5754	3940	15886	15907	8106	5518	3971	15145	15131	15140	3069	4015	6010	14289	15584	15386	3105	3137	4023	8417	14870	15174	3173	4419	6713	9393	11653	12580
324	5546	16082	5607	3885	15822	15859	8235	5514	3974	14986	15045	15180	3039	4066	5825	14472	15574	15182	3064	3098	4004	8428	14819	15144	3116	4458	6570	9230	11503	12606
326	5418	15947	5805	3871	15960	16071	8247	5611	4012	14908	15121	15145	3045	4092	5864	14755	15575	15344	3122	3109	3960	8437	14856	15108	3145	4414	6654	9289	11486	12595
328	5503	16101	5638	3969	15812	15684	8357	5641	4054	14846	15042	15371	2947	4047	5897	14751	15608	15233	3046	3166	3978	8445	14791	14895	3218	4432	6626	9454	11741	12661
330	5449	15962	5712	3985	15842	15611	8128	5701	4045	15045	15031	15147	3033	4001	5926	14631	15552	15107	3084	3197	3937	8520	14913	15036	3178	4566	6720	9454	11634	12697
332	5523	15998	5733	3979	15885	15765	8179	5543	4068	15100	15025	15336	3074	4120	5930	14552	15709	15426	3087	3113	3934	8507	14838	15191	3202	4343	6796	9470	11678	12525
334	5451	16116	5693	3985	15861	15763	8327	5675	4009	15130	15074	15391	3040	4141	5983	14789	15524	15245	3110	3099	3946	8681	15126	15121	3206	4485	6686	9356	11648	12818
336	5409	16047	5655	3971	15847	15955	8270	5712	4030	15039	15249	15260	3060	4009	5839	14558	15726	15422	3042	3156	3972	8535	14858	15214	3144	4532	6685	9407	11700	12608
338	5502	15997	5805	3969	15877	15943	8161	5599	4143	15024	15157	15537	3085	4072	5898	14639	15707	15483	3064	3179	3901	8711	14885	14934	3179	4550	6634	9379	11802	12809
340	5527	16015	5716	3949	15852	15584	8279	5640	4076	15164	15329	15509	3065	4070	5971	14706	15603	15288	3087	3236	3963	8583	15073	15285	3246	4509	6809	9402	11584	12860
342	5417	15975	5732	3883	15784	15836	8219	5645	4068	15282	14928	15197	3135	4122	5954	14730	15931	15311	3038	3118	3891	8694	15090	15140	3143	4484	6674	9521	11751	12714
344	5402	16058	5757	3950	15882	15814	8235	5752	3968	15273	15247	15256	3036	4142	6054	14654	15591	15338	3087	3163	3936	8506	14959	15290	3159	4544	6675	9543	11905	12773
346	5573	16038	5648	3916	15899	16124	8204	5736	4098	15248	15202	15305	3023	4042	5877	14858	15797	15314	3112	3182	3981	8664	14859	15224	3235	4459	6691	9605	11967	12662
348	5491	16069	5793	3898	16101	15802	8180	5702	4104	15120	15262	15291	3079	4112	5987	14912	15700	15501	3080	3174	3940	8673	14927	15334	3152	4404	6787	9514	11567	12846
350	5471	15939	5760	3978	15851	16055	8295	5644	4074	15148	15193	15452	3098	4097	5926	14779	15754	15298	3126	3166	4013	8699	15105	14957	3244	4464	6654	9711	11829	13071
352	5434	15971	5732	3922	15845	15944	8184	5709	4163	15163	15357	15443	3056	4121	5957	14711	15657	15747	3084	3161	4041	8753	14922	15598	3160	4526	6785	9695	11858	12876
354	5565	15960	5737	3906	16009	15905	8446	5730	4030	15209	15238	15463	3066	4075	5909	14930	15836	15309	3022	3165	4009	8772	15061	15436	3202	4559	6817	9700	11866	12851
356	5591	15811	5625	3984	15962	15834	8389	5698	4151	15039	15289	15536	3104	4114	6071	14689	15887	15440	3094	3189	3981	8798	15066	15351	3263	4455	6877	9796	11889	12855
358	5474	15921	5813	3995	16039	15889	8331	5742	4105	15172	15431	15581	3013	4066	5884	14765	15616	15487	3097	3180	3975	8817	15103	15411	3203	4494	6958	9731	11951	12800
360	5509	16026	5772	4007	15967	15866	8245	5664	3997	15111	15382	15381	3091	4101	5950	14914	15671	15603	3074	3230	4026	8667	15150	15263	3207	4533	6792	9795	12069	12903
362	5514	15940	5820	3965	15942	15897	8264	5723	4043	15230	15242	15371	3038	4198	6014	15079	15882	15556	3079	3203	4015	8854	15273	15535	3223	4506	6874	9851	12049	12914
364	5447	15983	5787	3964	15975	15904	8317	5617	4090	15236	15261	15376	3082	4131	6009	14825	15686	15324	3141	3139	4068	8893	15344	15291	3206	4579	6781	9631	12080	12975
366	5560	15918	5701	3909	15765	15945	8293	5721	4200	15218	15426	15560	3051	4135	6168	14971	15586	15444	3085	3159	3948	8797	15116	15241	3312	4572	6884	9829	11908	12985
368	5556	16143	5696	4054	15922	16058	8300	5571	4085	15301	15363	15438	3121	4113	6011	15128	15705	15589	3110	3120	3964	9039	15191	15462	3184	4618	6941	9822	12257	13070
370	5523	16168	5763	3934	16039	16042	8288	5839	4107	15356	15390	15589	3096	4106	6020	14967	15847	15655	3193	3154	4012	8927	15219	15313	3254	4453	6885	9846	12024	13031
372	5527	16046	5861	3921	15990	15864	8343	5679	4129	15199	15413	15450	3129	4098	6092	15129	15924	15479	3132	3155	4043	8884	15205	15322	3209	4560	6895	9870	12046	13126
374	5581	16100	5895	4024	15947	16051	8349	5732	4204	15340	15307	15548	3156	4150	6066	14901	15994	15480	3130	3150	4033	8820	15307	15327	3272	4526	6976	9890	12082	13104
376	5534	16081	5776	4006	16070	16181	8356	5659	4046	15214	15465	15604	3065	4186	6018	15027	15791	15587	3137	3184	3947	8947	15208	15657	3194	4544	6836	9958	12176	12934
378	5546	16132	5791	3947	16222	15930	8307	5698	4123	15289	15423	15457	3043	4160	6012	14900	15862	15567	3162	3171	3968	9058	15227	15515	3197	4536	6897	9983	12273	13206
380	5562	15881	5735	3960	15963	16086	8418	5738	4154	15408	15401	15705	3023	4088	6017	14990	15798	15565	3132	3214	4085	8971	15192	15331	3247	4528	6946	10024	12041	13137
382	5600	15995	5844	3970	15999	16173	8440	5677	4175	15131	15439	15598	3055	4190	6014	15223	15701	15587	3133	3192	4024	9119	15176	15376	3250	4551	6988	9923	12244	13048
384	5477	16006	5745	3987	16118	15925	8382	5689	4165	15156	15594	15620	3072	4279	6081	15050	15731	15583	3178	3254	4134	8988	15159	15298	3246	4609	6967	10140	12147	13227
386	5589	16061	5857	3939	15814	15885	8265	5738	4059	15389	15465	15449	3147	4173	6029	15107	15801	15632	3127	3219	4081	9097	15411	15482	3301	4634	6971	9998	12224	13230
388	5628	16299	5911	4086	15929	16111	8416	5713	4181	15465	15488	15585	2967	4124	6072	15086	15996	15780	3174	3230	4050	9087	15350	15532	3213	4683	6989	10141	12313	13253
390	5553	16136	5798	4034	15834	15914	8430	5770	4135	15326	15520	15605	3130	4128	6113	15173	15817	15531	3216	3179	4040	9010	15195	15550	3217	4569	6876	10085	12142	13221
392	5447	16174	5864	3896	15971	16002	8368	5811	4125	15132	15270	15609	3128	4161	6057	15064	15976	15484	3187	3231	4043	9026	15132	15256	3238	4587	6963	10173	12158	13130
394	5582	16059	5851	3970	15923	15912	8326	5801	4092	15348	15458	15539	3101	4189	6084	15046	15883	15499	3122	3231	4059	9113	15368	15419	3311	4623	6871	10195	12268	13121
396	5576	16128	5823	3921	15998	16174	8395	5889	4100	15469	15438	15856	3076	4181	5985	15109	15739	15482	3143	3172	4012	9089	15345	15342	3220	4611	6981	10147	12108	13245
398	5613	16081	5755	3999	16014	15975	8450	5797	4192	15351	15490	15707	3044	4213	6119	14779	15857	15532	3067	3168	4042	9134	15572	15395	3304	4661	6976	10246	12300	13149
400	5669	16076	5891	3903	15948	15983	8449	5697	4056	15332	15401	15709	3071	4143	6155	15223	16132	15568	3202	3216	4060	9078	15425	15437	3274	4678	6937	10159	12205	13264
402	5552	16172	5842	4029	16019	16151	8439	5826	4060	15619	15433	15685	3140	4118	6161	15275	16112	15686	3148	3202	4089	9222	15159	15362	3261	4718	6922	10172	12265	13211
404	5639	15985	5829	4031	15959	15897	8405	5780	4117	15464	15630	15429	3145	4273	6093	15090	15773	15613	3197	3238	4017	9109	15575	15553	3198	4615	6991	10220	12481	13308
406	5569	16310	5906	4022	16181	16006	8496	5747	4202	15386	15399	15662	3057	4206	6005	15171	15741	15683	3183	3284	3980	9119	15242	15628	3290	4716	7062	10362	12238	13147
408	5605	16239	5895	4030	15945	15876	8401	5773	4179	15391	15465	15685	3145	4210	6185	15090	15767	15582	3175	3275	4029	9314	15344	15309	3266	4682	6982	10314	12377	13346
410	5623	16274	5929	4057	16194	16059	8550	5720	4199	15315	15352	15628	3139	4190	6123	15268	15895	15634	3137	3253	4109	9353	15419	15426	3306	4657	7064	10304	12451	13245
412	5609	16258	5804	3969	15889	16079	8636	5815	4107	15533	15548	15673	3114	4102	6075	14974	15867	15530	3181	3196	4126	9253	15363	15269	3275	4543	7082	10447	12213	13555
414	5630	15999	5877	4040	15895	16022	8471	5791	4101	15422	15376	15446	3177	4208	6195	15102	15982	15774	3213	3299	4049	9306	15500	15662	3235	4674	6941	10292	12378	13248
416	5798	16034	5982	4058	16258	16073	8551	5669	4148	15503	15689	15822	3086	4185	6164	15351	15972	15613	3183	3254	4067	9260	15408	15449	3247	4753	7075	10273	12395	13384
418	5598	16106	5884	3969	16066	16029	8332	5909	4194	15394	15439	15773	3166	4214	6176	15221	15928	15766	3178	3228	4094	9255	15283	15302	3291	4588	7077	10507	12567	13332
420	5582	16285	5869	4041	16070	16054	8593	5752	4095	15372	15585	15848	3023	4248	6155	15282	16024	15519	3221	3207	4134	9459	15588	15566	3294	4771	7004	10459	12389	13216
422	5637	16182	5844	4029	16059	16213	8401	5834	4193	15386	15644	15717	3186	4288	6203	15168	15891	15842	3195	3169	4071	9282	15512	15494	3291	4608	7028	10313	12485	13369
424	5645	15937	5866	4008	16078	16021	8568	5809	4179	15373	15413	15756	3080	4157	6235	15222	15919	15726	3167	3213	4024	9382	15356	15597	3285	4654	6965	10368	12557	13318
426	5721	16142	5849	4037	16172	16133	8573	5835	4165	15336	15419	15779	3129	4223	6174	15166	15944	15742	3159	3272	4143	9269	15531	15550	3311	4672	7108	10506	12626	13392
428	5673	15973	6024	4098	16217	15896	8542	5824	4189	15521	15745	15783	3207	4296	6360	15346	15668	15768	3185	3216	4063	9421	15323	15455	3321	4722	7135	10515	12550	13346
430	5664	16262	5883	3986	16102	16060	8444	5784	4186	15622	15559	15611	3170	4216	6157	15387	15968	15539	3146	3292	4060	9352	15512	15445	3280	4640	7099	10511	12518	13406
432	5695	16243	5882	4105	16033	16103	8470	5787	4137	15412	15538	15588	3172	4219	6123	15279	16083	15626	3183	3191	4089	9340	15349	15628	3359	4732	7056	10571	12630	13349
434	5677	16048	5935	4012	16211	15865	8634	5781	4194	15417	15751	15621	3139	4270	6237	15237	15961	15835	3234	3252	4156	9412	15574	15688	3316	4634	7165	10540	12624	13478
436	5730	16091	6027	3986	16087	16177	8530	5918	4160	15341	15457	15670	3128	4207	6322	15343	15984	15717	3213	3240	4090	9429	15296	15595	3234	4716	7097	10641	12805	13600
438	5674	16194	5902	4035	15991	16053	8636	5790	4195	15505	15463	15760	3066	4248	6234	15344	15950	15946	3237	3292	4110	9476	15453	15606	3339	4687	7222	10684	12427	13354
440	5758	16386	5923	3980	16218	16014	8627	5717	4258	15395	15744	15896	3159	4197	6189	15433	16113	15818	3187	3299	4073	9522	15617	15754	3285	4703	7133	10584	12692	13560
442	5587	16125	6089	4007	15968	15975	8602	5913	4220	15414	15562	15935	3138	4347	6236	15397	15887	15727	3197	3271	4162	9398	15546	15608	3344	4685	7248	10639	12518	13547
444	5631	16085	5960	3988	16183	15853	8448	5881	4248	15266	15754	15881	3132	4245	6242	15483	15923	15655	3151	3321	4108	9560	15431	15612	3264	4797	7132	10703	12721	13453
446	5737	16092	6005	4120	15957	16170	8474	5781	4238	15670	15557	15964	3186	4170	6173	15305	16011	15900	3173	3336	4008	9553	15529	15570	3397	4677	7128	10619	12653	13375
448	5731	16002	5957	4089	15915	16120	8624	5830	4280	15534	15530	15912	3178	4272	6255	15382	15934	15776	3189	3316	4087	9589	15651	15487	3320	4640	7123	10607	12740	13548
450	5607	16303	6119	4057	15973	16123	8658	5896	4171	15572	15611	15834	3205	4213	6365	15463	15968	15826	3173	3239	4115	9582	15437	15603	3369	4676	7119	10757	12711	13536
452	5679	16164	6000	4022	16159	16194	8601	5960	4267	15438	15595	15813	3141	4179	6287	15455	15999	15838	3190	3300	4161	9528	15556	15570	3350	4681	7087	10703	12659	13592
454	5712	16118	6003	4046	16055	15915	8583	5878	4126	15499	15706	15929	3188	4258	6416	15351	15944	15793	3167	3242	4053	9613	15665	15674	3338	4781	7152	10699	12608	13583
456	5725	16220	6005	4070	15892	15896	8629	5985	4099	15554	15742	15911	3136	4184	6196	15389	16195	15870	3233	3209	4122	9728	15450	15557	3394	4737	7253	10796	12997	13675
458	5736	16070	5949	4039	16236	15826	8567	5948	4234	15255	15528	15784	3137	4374	6300	15443	16084	15861	3199	3305	4028	9630	15557	15715	3349	4793	7374	10846	12706	13610
460	5652	16048	5990	4006	16004	16122	8629	5875	4309	15660	15475	15696	3130	4291	6304	15443	16093	15723	3161	3302	4240	9576	15568	15735	3337	4773	7300	10788	12832	13605
462	5725	16340	5923	4051	16066	16171	8622	5906	4137	15653	15662	15730	3130	4234	6315	15342	16001	15688	3242	3257	4186	9645	15721	15747	3297	4724	7335	10767	12805	13679
464	5645	15983	5928	4164	15999	16211	8577	5926	4186	15591	15803	15877	3116	4287	6182	15237	15902	15912	3310	3327	4163	9844	15627	15796	3389	4741	7280	10862	12968	13659
466	5679	16250	6100	3981	16000	15940	8553	5870	4162	15629	15678	15798	3218	4254	6361	15200	15926	15679	3180	3253	4059	9814	15668	15545	3357	4701	7178	10767	12797	13512
468	5685	16205	6039	4003	16250	16114	8606	5964	4273	15603	15559	15844	3123	4400	6264	15334	16100	15703	3145	3288	4107	9695	15571	15806	3379	4770	7315	10854	12949	13692
470	5729	16074	5987	4153	16081	16138	8484	5998	4238	15672	15698	15851	3154	4213	6351	15497	16059	15769	3201	3208	4153	9664	15475	15573	3368	4783	7263	10866	12757	13767
472	5711	16188	6056	4115	16286	16037	8650	5975	4240	15506	15627	15980	3101	4255	6258	15640	16120	15996	3237	3305	4089	9762	15635	15507	3402	4840	7221	10878	12977	13633
474	5765	16161	6053	4147	16259	15976	8754	5931	4279	15563	15590	15704	3141	4237	6316	15291	16271	15763	3187	3327	4138	9735	15495	15598	3347	4725	7206	10846	12869	13864
476	5749	16062	5934	4050	16412	16083	8719	5908	4178	15559	15815	15810	3169	4379	6397	15475	16130	15782	3208	3348	4221	9629	15854	15675	3342	4867	7330	10966	12728	13703
478	5708	16289	6013	4013	16101	16003	8562	6023	4233	15712	15607	15916	3179	4376	6304	15636	16015	16073	3252	3307	4078	9826	15825	15787	3369	4784	7290	10915	12949	13703
480	5742	16256	6037	4039	16266	16037	8721	5927	4293	15413	15875	15983	3122	4390	6302	15400	16048	15921	3206	3312	4121	9857	15567	15702	3315	4807	7235	10927	13023	13744
482	5717	16271	5987	4137	16287	16132	8645	5940	4218	15591	15597	15887	3132	4271	6321	15680	16262	15907	3123	3372	4218	9759	15503	15670	3455	4728	7221	11093	12873	13686
484	5782	16271	5969	3996	16196	15928	8656	5855	4207	15537	15655	15989	3111	4365	6285	15426	16003	15739	3250	3290	4186	9734	15653	15975	3252	4837	7347	11033	13067	13778
486	5750	16290	6106	4054	16012	16137	8775	6004	4175	15456	15978	15799	3165	4307	6304	15451	16203	15890	3153	3347	4047	9956	15889	15751	3370	4746	7371	10937	12979	13767
488	5760	16361	6030	4104	16003	16045	8752	5857	4226	15482	15706	15930	3147	4316	6395	15522	16084	15820	3204	3314	4210	9867	15809	15777	3399	4820	7356	11070	12877	13773
490	5656	16207	6145	4052	16100	16092	8758	5972	4260	15491	15721	15932	3152	4261	6463	15618	16007	15781	3264	3263	4128	9953	15542	15719	3403	4841	7340	11102	13154	13684
492	5737	16070	5974	4055	15936	16231	8794	5871	4215	15461	15816	16024	3127	4317	6492	15494	16289	15951	3207	3367	4154	10031	15816	15842	3394	4927	7370	11168	12964	13883
494	5646	16264	6034	4124	16278	16117	8743	5940	4160	15664	15567	15949	3173	4299	6412	15596	16165	15649	3236	3300	4055	10096	15824	15829	3368	4767	7364	11107	13036	13809
496	5778	16122	5921	4116	16177	16242	8772	5983	4237	15759	15817	15847	3111	4294	6373	15729	16196	16056	3187	3349	4160	10063	15591	15747	3451	4804	7416	11168	12871	13915
498	5767	16144	6013	4108	15965	15833	8742	5881	4174	15649	15721	16044	3163	4300	6334	15441	16074	16001	3274	3284	4125	10019	15938	15794	3383	4868	7487	11189	13166	13724
500	5775	16108	6076	4008	16072	15896	8810	5898	4261	15407	15852	15903	3216	4373	6387	15528	16211	15968	3207	3369	4121	9901	15739	15857	3356	4859	7335	11277	13083	13766
502	5689	16033	6071	4077	16004	16185	8605	5983	4247	15646	15700	15976	3190	4355	6340	15845	16055	15908	3246	3331	4251	9940	15884	15746	3411	4873	7484	11233	13074	14004
504	5678	16156	6140	4117	15996	16017	8740	5917	4236	15555	15745	15769	3245	4353	6277	15622	15974	16126	3226	3386	4139	10045	15576	15809	3377	4884	7392	11366	13293	13924
506	5757	16047	6165	4092	16147	16139	8855	5902	4276	15579	15750	15743	3225	4386	6381	15465	16172	15972	3194	3397	4175	10058	15849	15842	3500	4923	7510	11279	13211	13813
508	5771	16259	6188	4129	16189	15940	8837	6032	4180	15681	15838	15828	3213	4428	6364	15630	16159	16127	3251	3313	4247	10078	15851	15894	3440	4832	7353	11294	13057	13859
510	5783	16137	6084	4031	16320	15936	8878	6007	4245	15669	15914	15988	3227	4454	6474	15661	16211	16142	3317	3344	4216	10117	15692	15708	3415	4886	7384	11235	13225	13917
512	5783	16181	6207	4121	15983	15875	8815	5919	4326	15571	15735	15981	3185	4378	6289	15692	16439	15822	3303	3429	4129	10017	15749	15894	3463	4873	7387	11260	12988	13723
514	5825	16219	6151	4171	16157	16178	8898	5926	4285	15772	15846	15812	3236	4392	6515	15710	16079	15933	3282	3312	4173	10093	15941	16030	3377	4914	7483	11300	13283	13917
516	5824	16435	6119	4072	16226	16095	8822	5955	4285	15610	15832	15948	3199	4362	6487	15749	16328	15856	3166	3277	4135	10108	15766	15941	3361	4889	7486	11272	13228	13986
518	5781	16392	6086	4076	16264	15967	8919	5995	4241	15500	15683	15829	3225	4411	6313	15689	16191	15995	3257	3380	4221	10139	15895	15915	3355	4862	7442	11300	13137	14000
520	5820	16270	6018	4092	16138	16015	8869	5927	4281	15577	15743	16001	3184	4367	6435	15547	16111	15790	3230	3403	4162	10152	15673	15761	3389	4845	7379	11227	13176	14040
522	5785	16189	6118	4061	16082	16090	8916	5967	4176	15631	15920	16165	3179	4339	6411	15700	16162	15869	3249	3390	4331	9991	15804	15915	3472	4873	7538	11337	13128	13936
524	5783	16299	6155	4115	16026	16076	8806	6001	4251	15743	15789	15919	3176	4373	6483	15722	16401	16094	3238	3335	4270	10200	15869	15831	3374	4901	7464	11305	13272	13986
526	5772	16395	6170	4097	16266	15872	8915	5912	4222	15681	15719	16044	3127	4346	6429	15688	15930	16021	3319	3259	4178	10212	15804	15722	3491	4874	7481	11467	13280	13803
528	5868	16324	6214	4067	16231	16208	8856	5927	4333	15635	15848	15922	3196	4423	6431	15875	16256	16157	3230	3417	4147	10221	15723	15840	3429	4915	7452	11386	13453	14139
530	5920	16351	6014	4108	16034	16092	8967	6035	4292	15703	15978	15908	3227	4460	6515	15640	16076	15980	3245	3328	4170	9981	15823	15739	3429	4963	7598	11532	13110	14194
532	5752	16195	6136	4132	16201	16070	8835	5892	4234	15727	15819	16004	3281	4387	6428	15623	16185	15879	3263	3385	4125	10033	15733	15737	3515	4856	7561	11531	13347	13993
534	5634	16264	6148	4113	16195	16145	8852	5964	4209	15358	15539	15961	3223	4390	6477	15499	16047	15872	3198	3356	4173	10165	15805	15841	3392	4896	7573	11406	13202	14049
536	5811	16168	6089	4119	16170	15967	8927	5949	4304	15673	15804	16021	3246	4441	6453	15711	16173	16165	3289	3435	4197	10384	16042	15870	3423	4937	7525	11473	13364	14088
538	5797	16404	6215	4100	16480	16203	8833	5978	4242	15782	15913	15984	3259	4348	6513	15744	16266	16141	3280	3360	4229	10236	15972	15857	3349	4973	7567	11391	13442	13892
540	5785	16275	6145	4189	16079	16154	8949	5959	4346	15657	15882	15943	3203	4380	6420	15860	16076	16065	3284	3343	4120	10234	15763	15689	3417	4850	7496	11601	13328	14284
542	5708	16258	6272	4106	16165	16108	9030	5839	4298	15674	15851	16079	3146	4477	6416	15562	16301	16022	3234	3376	4306	10395	15706	15763	3516	4964	7384	11537	13411	14227
544	5746	16383	6151	4112	16144	16063	8966	5983	4294	15679	15908	16161	3196	4392	6435	15784	16123	15863	3313	3346	4189	10416	15874	15556	3368	4946	7698	11519	13325	14029
546	5795	16285	6079	4161	16161	16440	8972	6008	4275	15733	15804	16099	3146	4458	6319	15867	16268	16068	3193	3395	4187	10338	15899	15821	3452	4873	7518	11402	13501	13843
548	5868	16241	6166	4073	16206	16014	8823	5950	4342	15834	15647	15901	3317	4503	6541	15620	16210	16016	3256	3324	4196	10266	15901	15985	3432	4939	7435	11707	13459	14096
550	5829	16050	6165	4133	16166	16101	8875	5964	4306	15673	15692	15963	3173	4421	6373	15746	16226	15926	3264	3296	4219	10252	15690	15758	3373	4966	7671	11609	13468	14170
552	5762	16255	6157	4112	16199	16184	9006	5990	4320	15643	16002	16128	3187	4361	6534	15882	16092	15816	3327	3348	4248	10348	15855	15802	3530	4912	7537	11708	13394	14067
554	5816	16195	6242	4259	16275	16004	8797	6003	4310	15718	15862	16176	3267	4422	6450	15534	16057	15992	3335	3313	4212	10405	15846	15853	3389	4874	7467	11540	13324	13990
556	5798	16162	6169	4163	16190	16136	9007	6162	4318	15781	15837	15937	3202	4435	6372	15733	16197	16022	3330	3409	4209	10361	15784	15735	3469	5004	7590	11644	13491	14140
558	5814	16311	6196	4150	15960	16121	9003	6044	4338	15916	15918	15905	3230	4392	6507	15853	16133	16022	3314	3492	4259	10274	15941	15814	3427	4938	7710	11621	13435	14063
560	5869	16277	6157	4110	16033	16134	8807	6066	4390	15865	15933	16268	3216	4468	6557	15764	16164	15888	3349	3370	4200	10376	15939	15729	3340	4891	7625	11641	13382	14153
562	5839	16146	6117	4193	16110	15928	8861	6094	4251	15764	15903	15872	3219	4314	6493	15746	16192	16125	3304	3364	4235	10417	15708	15848	3492	4985	7534	11825	13365	14289
564	5805	16269	6242	4199	16040	16012	9116	6069	4319	15656	15675	15939	3266	4498	6502	15968	16208	16120	3349	3423	4216	10454	15717	16010	3431	4958	7537	11694	13484	14121
566	5813	16253	6168	4119	16210	16214	9092	5957	4296	15758	15919	16003	3196	4409	6492	15822	16313	16050	3301	3381	4206	10527	15557	15864	3429	5032	7580	11756	13413	14202
568	5759	16292	6152	4088	16163	16113	8983	6049	4227	15671	15969	16102	3270	4394	6453	15774	16075	16056	3292	3361	4196	10620	15697	15884	3454	4972	7698	11694	13397	14111
570	5817	16196	6177	4240	16098	16017	8906	5969	4307	15790	15900	16066	3217	4486	6571	15502	16359	16130	3274	3417	4266	10636	16045	15714	3565	5098	7654	11584	13362	14095
572	5879	16316	6254	4095	15942	15975	8960	6078	4302	15813	15788	15959	3251	4486	6526	15929	16296	16077	3289	3391	4274	10474	15810	15942	3364	5010	7685	11744	13262	14130
574	5895	16283	6173	4251	16277	16201	8942	6039	4297	15690	15847	16121	3175	4532	6540	15783	16190	15895	3346	3387	4319	10456	15789	15725	3498	5005	7594	11836	13422	14212
576	5798	16250	6242	4077	16188	16050	9143	5950	4325	15769	15840	15997	3225	4487	6545	15741	16086	15924	3257	3394	4184	10521	15828	15869	3487	5084	7614	11752	13554	14186
578	5848	16495	6170	4064	16182	16019	8948	6023	4336	15844	15964	15918	3276	4437	6575	15913	16253	16096	3349	3374	4236	10509	15951	16027	3468	5002	7628	11743	13441	14195
580	5862	16248	6185	4149	16129	16202	8989	6101	4362	15688	15943	16079	3288	4549	6594	15762	16011	16115	3293	3417	4305	10517	16017	15798	3514	5044	7564	11956	13576	14237
582	5948	16380	6285	4164	16173	16061	9019	6052	4270	15673	15861	16260	3223	4486	6525	15876	16104	15971	3311	3402	4252	10572	16029	15707	3498	5120	7649	11787	13519	14195
584	5831	16345	6201	4123	16100	16091	9002	5989	4314	15481	15767	16074	3247	4405	6574	15755	16098	15903	3324	3409	4207	10611	16053	15894	3520	5073	7703	12098	13502	14275
586	5766	16170	6256	4077	16248	16117	9025	6079	4295	15740	15913	16033	3252	4497	6717	15908	16215	15995	3334	3404	4283	10624	15888	15668	3494	4990	7626	11759	13537	14180
588	5800	16235	6149	4206	16257	16229	9083	6074	4262	15935	15951	16075	3240	4477	6553	15766	16208	15939	3261	3369	4225	10481	15918	16055	3453	5060	7701	12098	13653	14164
590	5757	16304	6168	4210	16283	16207	8965	6081	4271	15651	15873	15975	3314	4475	6582	15660	16213	15996	3269	3465	4236	10639	15855	15997	3462	5045	7736	11836	13666	14340
592	5923	16117	6151	4183	15949	15994	9183	6111	4350	15624	15805	15889	3308	4432	6538	16038	16273	15872	3280	3340	4297	10541	15843	15956	3536	5049	7624	11924	13552	14190
594	5879	16395	6222	4166	16212	16103	9179	6025	4301	15808	15910	16335	3170	4420	6655	15587	16175	16002	3291	3391	4289	10531	16042	15900	3443	5026	7781	11843	13605	14194
596	5897	16132	6142	4154	16172	16205	9029	6123	4375	15779	15843	15969	3191	4573	6674	16052	16087	15993	3225	3325	4313	10655	15894	16054	3514	5079	7761	11859	13578	14362
598	5820	16288	6367	4220	16232	16092	9047	6051	4293	15921	15732	16185	3280	4438	6652	15898	16345	15940	3310	3415	4276	10534	16106	15986	3533	5002	7629	11849	13707	14217
600	5868	16134	6265	4251	16097	16066	9000	6166	4332	15892	15836	15864	3257	4502	6631	15649	16055	15997	3297	3442	4284	10717	15822	15721	3489	5079	7763	12075	13737	14307
602	5804	16245	6225	4175	16198	16271	8852	6028	4271	15685	15862	16181	3224	4483	6549	15713	16214	15881	3347	3462	4319	10683	15908	16135	3494	5030	7779	11946	13681	14444
604	5844	16281	6224	4116	16267	16221	9105	6140	4265	15616	15871	16115	3310	4552	6593	15767	16379	16103	3311	3403	4254	10775	15758	15989	3518	5086	7797	11992	13553	14276
606	5868	16396	6255	4202	16048	15989	9000	6001	4376	15694	15944	16093	3257	4494	6609	15831	16280	15835	3333	3322	4353	10704	15762	15958	3555	5063	7865	11993	13655	14482
608	5870	16448	6208	4169	16032	15999	9157	6217	4355	15918	15974	15881	3292	4585	6691	15824	16287	16391	3295	3396	4314	10740	15806	16076	3430	5134	7837	12133	13518	14172
610	5856	16297	6285	4203	16067	16186	9022	6074	4346	15828	15880	16204	3271	4497	6701	15776	16217	15989	3341	3447	4264	10466	16029	15790	3559	5104	7648	12058	13847	14525
612	5830	16238	6290	4115	16213	15962	9017	6089	4275	15644	15930	15962	3292	4463	6700	15844	16190	16088	3268	3388	4287	10771	16065	15777	3475	5062	7697	12059	13596	14455
614	5840	16456	6284	4210	16289	16167	9051	6032	4364	15790	15909	16105	3208	4528	6632	15784	16345	15978	3321	3406	4241	10887	15779	16046	3529	5175	7800	11968	13854	14304
616	5847	16267	6301	4226	16176	16253	9206	6172	4294	15938	15779	16146	3315	4538	6663	15882	16130	15994	3337	3437	4280	10838	15830	15892	3453	5117	7748	12032	13838	14203
618	5969	16150	6440	4257	16084	16287	9147	6153	4353	15834	15907	16089	3281	4550	6716	15898	16122	15954	3346	3477	4330	10834	15884	15914	3545	5120	7641	12050	13824	14514
620	5888	16308	6235	4192	16049	15871	9223	6175	4309	15684	15965	16240	3331	4560	6649	15913	16348	16001	3288	3374	4349	11016	15990	15896	3521	5091	7756	12196	13707	14293
622	5819	16101	6165	4109	16092	16205	9137	6123	4324	15731	15818	16160	3313	4469	6719	15860	16213	15989	3263	3465	4340	10830	15858	15947	3545	5066	7770	12014	13778	14504
624	5868	16261	6179	4137	16194	16083	9013	6074	4332	15816	15932	15994	3284	4454	6710	15796	16467	15890	3317	3454	4301	10866	16047	15918	3472	5142	7861	12176	13739	14239
626	5856	16153	6350	4232	16343	16146	9076	6151	4396	15880	16080	16197	3258	4538	6650	15952	16458	16064	3357	3455	4380	10788	16029	16053	3517	5092	7801	11981	13637	14522
628	5865	16404	6295	4187	16079	16141	9069	6065	4348	15906	16006	16009	3393	4554	6713	15798	16019	15910	3261	3406	4271	10960	15847	15843	3517	5201	7901	12053	13865	14416
630	5932	16189	6310	4196	16157	16176	9064	6094	4312	15960	15944	16222	3214	4513	6702	15925	16134	15938	3352	3440	4310	10790	15947	16231	3524	5144	7948	12249	13651	14531
632	5898	16216	6279	4137	16400	16055	9113	6135	4314	15922	15914	16170	3308	4541	6665	15835	16331	16042	3401	3436	4285	10766	16122	15844	3524	5149	7826	12200	13831	14295
634	5824	16171	6279	4229	16336	16094	9133	6140	4365	15753	15757	16135	3307	4539	6465	15781	16364	16231	3401	3346	4300	10917	15851	15938	3495	5072	7899	12181	13887	14523
636	5907	16369	6300	4216	16181	16120	9143	6117	4376	15988	15911	16210	3330	4497	6779	15622	16013	16130	3338	3420	4368	10970	15879	15926	3460	5191	7737	12114	13726	14451
638	5796	16322	6260	4332	16024	16054	9028	6242	4425	15829	15716	16070	3344	4492	6673	15868	16169	15884	3318	3450	4285	10863	16030	15910	3551	5146	7994	12257	13969	14514
640	5876	16331	6290	4194	16198	16225	9038	6149	4354	15837	15866	16254	3346	4548	6598	15929	16240	15976	3277	3464	4375	10769	16071	15882	3614	5123	7788	12183	13956	14510
642	5920	16359	6322	4243	16218	15976	9100	6257	4341	15713	16002	16217	3304	4518	6771	15931	16181	15797	3337	3399	4345	11057	15930	15865	3528	5152	7765	12322	13963	14522
644	5978	16234	6374	4252	16299	16197	9137	6083	4368	15804	15915	15952	3234	4531	6822	15967	16158	15859	3346	3407	4330	10876	16051	15992	3523	5122	7834	12223	13922	14358
646	5851	16349	6438	4201	16131	16168	9199	6042	4338	15802	15876	15967	3223	4497	6799	15749	16226	15959	3380	3412	4331	10926	16296	16073	3567	5153	7903	12122	13910	14486
648	5916	16159	6306	4360	16252	16095	9153	6100	4399	15977	15863	16073	3285	4503	6709	15796	15929	16120	3286	3440	4331	11086	15966	16043	3577	5142	7962	12298	13842	14523
650	5914	16446	6330	4091	16169	16154	9084	6021	4512	15941	15992	16192	3204	4492	6627	16031	16525	16080	3339	3451	4371	10842	15891	15897	3550	5122	7922	12353	13974	14600
652	5936	16289	6324	4164	16148	15981	9169	6199	4340	15974	15872	16153	3271	4502	6818	15901	16200	16054	3295	3406	4250	11177	15995	15781	3594	5055	7908	12290	13834	14421
654	5905	16231	6194	4271	16136	16280	9126	6203	4366	15771	15930	16126	3326	4578	6575	15874	16193	15887	3308	3462	4391	10989	15949	16102	3602	5162	7904	12549	13883	14494
656	5995	16378	6237	4290	16102	16251	9124	6151	4346	15694	16109	16301	3366	4540	6791	15855	16132	15997	3377	3490	4340	10970	15855	16006	3634	5201	7851	12384	13866	14629
658	5971	16352	6215	4225	15977	16044	9113	6121	4397	15796	15832	15948	3352	4590	6796	16077	16107	16171	3339	3434	4344	11143	15789	16024	3469	5119	7869	12396	13925	14492
660	5925	16280	6375	4209	16094	16215	9024	6059	4343	15914	16043	16206	3308	4566	6708	15904	16291	16128	3289	3435	4352	11094	16072	16019	3527	5280	8084	12205	13826	14562
662	5974	16219	6332	4196	16079	16253	9243	6138	4335	15973	15933	16161	3258	4561	6689	16015	16203	15999	3383	3389	4374	10970	15953	16035	3510	5241	7888	12541	13899	14401
664	5862	16482	6410	4227	16415	15885	9297	6115	4364	15789	16005	16111	3370	4549	6738	15986	16275	15991	3399	3410	4418	11115	16102	15978	3557	5119	7886	12458	13885	14352
666	5967	16210	6296	4244	16141	16115	9324	6215	4341	16079	15957	16349	3425	4680	6803	15956	16114	15856	3379	3481	4314	11165	16189	15839	3614	5224	7914	12491	14037	14259
668	5918	16479	6370	4221	16216	16204	9334	6146	4321	15891	15964	16202	3320	4530	6737	16023	16186	16172	3382	3460	4337	11090	16014	16211	3557	5145	7955	12532	14058	14485
670	6013	16238	6426	4224	16226	16008	9264	6110	4435	15925	16000	16060	3371	4616	6661	15917	16138	16216	3332	3487	4415	11103	16124	15971	3556	5123	7957	12624	13984	14331
672	5929	16251	6466	4222	16130	15907	9358	6193	4380	15968	15757	16196	3269	4536	6719	16034	16342	16065	3374	3438	4389	11127	16054	15904	3600	5153	8042	12510	13993	14514
674	6053	16272	6278	4250	16191	16115	9163	6185	4394	15926	16000	16093	3296	4601	6838	15940	16037	16219	3290	3462	4287	11032	16018	16036	3610	5054	7919	12574	13935	14800
676	5903	16545	6360	4290	16189	16273	9161	6113	4501	16126	16038	16170	3267	4508	6848	16012	16363	16170	3438	3518	4311	11169	16040	15803	3568	5199	7962	12596	13937	14614
678	5959	16277	6374	4198	16106	16019	9309	6144	4316	15719	16025	16203	3370	4492	6844	15997	16273	16199	3316	3538	4318	11088	16142	16040	3671	5136	7890	12536	14006	14630
680	5940	16225	6362	4232	16202	16305	9316	6136	4400	15712	15904	15925	3329	4590	6713	15963	16433	16102	3427	3563	4397	11323	16025	16163	3545	5217	8009	12654	14078	14524
682	5959	16356	6313	4179	16172	15982	9185	6305	4438	15858	15859	16095	3269	4595	6679	16047	16103	16099	3408	3560	4299	11171	15905	16226	3614	5210	8116	12592	14058	14659
684	6002	16212	6385	4280	16186	16176	9351	6238	4400	15893	16014	16242	3297	4678	6798	15899	16221	16312	3313	3570	4318	11073	16139	16234	3591	5226	8027	12484	13931	14518
686	6018	16190	6407	4147	16225	16097	9353	6199	4348	16032	15889	16471	3364	4580	6830	16082	16121	15812	3380	3458	4374	11217	16005	16067	3618	5218	8061	12494	14028	14815
688	5916	16510	6397	4181	16306	16170	9213	6256	4434	16004	15984	16190	3379	4643	6723	15850	16341	16183	3387	3439	4397	11210	16052	15831	3531	5213	7988	12751	14088	14772
690	6074	16424	6271	4192	16256	16307	9386	6213	4382	16152	16001	16248	3390	4586	6844	15868	16343	16299	3443	3454	4346	11297	16008	15967	3568	5234	8025	12461	13957	14675
692	5909	16215	6454	4275	16138	16140	9380	6218	4366	15839	15931	16318	3361	4582	6787	16010	16350	15991	3405	3519	4406	11184	16153	15953	3629	5255	8010	12548	14120	14577
694	6016	16318	6311	4227	16031	16120	9257	6153	4465	16027	15980	16143	3331	4586	6905	16119	16443	16137	3381	3508	4311	11185	16025	15978	3505	5245	8049	12609	14211	14885
696	5955	16357	6305	4297	16035	16106	9305	6179	4362	15943	16119	16244	3406	4618	6807	15848	16385	15993	3451	3474	4349	11403	15991	15963	3574	5273	8126	12574	14042	14683
698	6057	16437	6339	4341	16324	16030	9245	6211	4371	15936	15785	16248	3359	4637	6751	15935	16260	15941	3381	3500	4290	11366	15998	15955	3566	5230	8004	12736	13950	14649
700	5963	16244	6428	4267	16196	16087	9257	6260	4541	15905	15928	16233	3366	4512	6835	15881	16160	16047	3371	3418	4302	11365	15857	16154	3558	5251	7998	12548	14174	14468
702	5966	16103	6315	4289	16194	16101	9193	6252	4410	15786	15899	16085	3399	4713	6672	16123	16192	15999	3358	3453	4395	11387	15736	16172	3578	5239	7933	12673	14052	14756
704	5963	16294	6318	4276	16231	16097	9100	6266	4420	16033	15977	16341	3374	4657	6798	16036	16227	15931	3346	3494	4304	11325	16240	16054	3568	5339	8147	12717	14065	14647
706	5940	16297	6362	4250	16169	16235	9248	6155	4407	15942	16098	16388	3341	4653	6839	15854	16298	16224	3360	3588	4318	11364	16303	16095	3543	5219	8066	12599	13996	14869
708	5991	16201	6395	4258	16128	16162	9297	6169	4436	15829	15873	16067	3311	4645	6827	16084	15997	16162	3432	3549	4390	11420	16022	16113	3591	5239	8117	12729	13981	14515
710	6006	16502	6411	4197	16308	15952	9332	6150	4459	15893	16143	16205	3384	4610	6867	16133	16137	15957	3385	3614	4412	11288	15965	15931	3583	5233	8111	12682	14124	14621
712	6009	16723	6384	4196	16215	16138	9421	6113	4450	15892	15896	16331	3386	4584	6900	15996	16169	16068	3368	3545	4371	11387	16050	16136	3583	5356	8137	12733	14131	14631
714	5933	16418	6508	4223	16152	16092	9334	6150	4387	15892	16123	16112	3389	4672	6876	16069	16262	16167	3350	3552	4443	11420	16189	15898	3600	5216	8129	12750	14070	14812
716	5937	16123	6447	4198	16201	16137	9371	6256	4383	15864	15942	16435	3332	4608	6798	15907	16243	15980	3414	3473	4329	11465	16319	16082	3597	5355	8020	12672	14139	14812
718	6020	16507	6395	4188	16165	16256	9352	6209	4471	15911	16151	16269	3361	4670	6840	16276	16336	16120	3361	3544	4349	11272	15835	15985	3663	5300	8176	12725	14198	14501
720	5924	16228	6355	4224	16227	16126	9456	6234	4393	15974	16179	16259	3308	4704	7018	16148	16234	16167	3377	3453	4355	11248	16199	16253	3565	5269	8199	12878	14029	14723
722	5926	16330	6442	4244	16338	16263	9270	6147	4436	16014	16031	16236	3350	4682	6905	16034	16189	16102	3374	3484	4368	11358	16016	15930	3630	5329	8133	12745	14214	14717
724	5965	16290	6448	4307	16166	16098	9436	6210	4461	15753	16082	16407	3350	4679	6933	16030	16349	16157	3476	3495	4389	11496	16027	16117	3587	5169	8178	12880	14077	14930
726	5877	16468	6396	4325	16068	16258	9377	6359	4443	16049	15885	16028	3391	4817	7048	15947	16280	16064	3410	3509	4440	11413	15884	16115	3731	5322	8162	12685	14068	14738
728	5944	16209	6381	4190	16211	16100	9226	6309	4378	15777	16045	16171	3342	4616	6801	15802	16179	16094	3305	3562	4337	11455	16191	15936	3563	5413	8073	12680	14229	14758
730	6035	16521	6360	4289	16079	16203	9410	6194	4351	16038	15977	16251	3343	4669	6741	16005	16317	16117	3330	3526	4440	11511	16043	16058	3646	5458	8207	13040	14254	14638
732	5996	16290	6448	4196	16324	16163	9322	6298	4394	15832	15844	16254	3410	4569	6838	15983	16493	16032	3341	3548	4437	11350	16319	16063	3578	5267	8206	12897	14328	14699
734	6097	16493	6545	4274	16208	16092	9329	6266	4451	15955	15811	16342	3317	4659	6921	16101	16237	16270	3477	3614	4407	11448	15955	16075	3634	5377	8109	12814	14231	14705
736	6074	16223	6411	4316	16182	16163	9284	6203	4427	15996	16011	16304	3360	4671	6885	16067	16352	16081	3443	3521	4365	11364	16212	15931	3660	5220	8135	12795	14346	14799
738	6085	16318	6356	4208	16198	15995	9304	6243	4472	15916	15884	16240	3390	4703	6889	16186	16304	16029	3399	3563	4450	11506	16095	16184	3624	5296	8114	12941	14310	14785
740	5980	16052	6417	4265	16280	16119	9385	6325	4370	15903	16328	16337	3332	4681	6931	16192	16295	16186	3365	3547	4408	11304	16002	16062	3573	5251	8271	13022	14022	14539
742	6027	16198	6568	4351	16347	16202	9493	6194	4457	15958	15822	16288	3348	4669	6928	16148	16332	15973	3356	3486	4393	11374	16201	16096	3661	5350	8245	12882	14097	14719
744	5969	16322	6604	4244	16056	16033	9405	6144	4386	15860	15892	16370	3360	4713	6842	16058	16281	16245	3374	3524	4404	11581	16126	16096	3650	5247	8186	12813	14250	14924
746	5971	16122	6536	4296	16282	16025	9338	6181	4476	15956	16132	16352	3383	4668	6840	16097	16562	16081	3346	3525	4359	11500	16122	16004	3616	5322	8121	12719	14376	14977
748	6019	16299	6452	4271	16078	16259	9340	6177	4407	15951	15813	16108	3403	4749	6847	15958	16327	16079	3451	3522	4466	11475	15953	16027	3631	5454	8105	12960	14257	14897
750	6073	16260	6538	4297	16269	16260	9410	6170	4475	15777	15911	16319	3363	4679	6926	16062	16217	16262	3400	3518	4318	11538	16219	16108	3684	5397	8349	12859	14364	14927
752	5888	16373	6366	4280	16187	16006	9492	6263	4461	15957	15905	16174	3395	4735	6931	16050	16277	16144	3416	3554	4400	11634	16209	16013	3650	5331	8269	13032	14241	14785
754	6088	16413	6507	4318	16491	16292	9353	6165	4447	16019	15866	16304	3352	4742	6912	15975	16326	15869	3461	3588	4345	11667	16241	15956	3708	5374	8267	12979	14325	14870
756	6064	16202	6633	4234	16074	16139	9403	6186	4496	15759	15895	16457	3458	4687	6961	15942	16364	16120	3461	3565	4464	11512	16240	15961	3781	5365	8242	13112	14138	14846
758	6071	16396	6536	4287	16091	16278	9340	6250	4398	15905	15983	16376	3384	4625	6888	16113	16130	16161	3451	3576	4420	11511	16300	15823	3598	5366	8312	13019	14155	14701
760	6010	16145	6470	4225	16021	16196	9355	6308	4489	15824	16002	16230	3467	4631	7005	15923	16322	16162	3434	3561	4486	11555	16055	16295	3685	5387	8157	12896	14376	14736
762	6036	16177	6526	4241	16259	15921	9347	6314	4416	15920	15992	16025	3387	4699	6885	16220	16300	16009	3354	3518	4425	11625	16020	16146	3564	5415	8320	12959	14326	14856
764	6064	16200	6524	4258	16172	16284	9427	6313	4464	15911	16061	16019	3382	4755	6884	15994	16276	16020	3434	3593	4433	11366	16028	16048	3684	5348	8206	13014	14288	14869
766	6063	16069	6537	4270	16294	16249	9381	6253	4439	15980	15793	16293	3415	4683	6895	16021	16236	16129	3451	3561	4416	11532	16040	15995	3737	5331	8187	12836	14334	14762
768	6115	16515	6520	4253	16280	16370	9283	6197	4477	16086	16039	16060	3426	4738	6947	16220	16218	16322	3431	3594	4441	11419	15929	16159	3699	5387	8371	13149	14299	14958
770	5999	16383	6552	4212	16424	16119	9541	6192	4476	15807	15965	16444	3365	4687	6970	15949	16343	16058	3476	3570	4426	11632	15999	15891	3616	5419	8140	13034	14271	14711
772	6006	16298	6544	4304	16091	16171	9446	6207	4468	15789	16055	16119	3400	4698	6930	15963	16331	16219	3513	3619	4418	11745	15945	15993	3651	5495	8371	12951	14212	14973
774	6060	16352	6547	4348	16253	16185	9455	6218	4533	16002	16041	16258	3426	4763	6859	16089	16180	16150	3415	3530	4499	11755	16185	16184	3591	5367	8344	13136	14078	14846
776	6012	16245	6504	4352	15952	16218	9432	6284	4441	15906	15929	16568	3270	4632	7050	15766	16274	16308	3445	3586	4436	11577	16076	16252	3661	5316	8114	13322	14484	14978
778	6140	16366	6493	4252	16034	16174	9492	6247	4453	16022	15918	16341	3378	4729	7039	16030	16263	16327	3453	3623	4433	11666	16260	16178	3621	5359	8275	12944	14511	14995
780	5957	16450	6529	4302	16144	16259	9439	6314	4570	15820	16027	16191	3392	4678	7018	15921	16327	16345	3483	3589	4489	11585	15934	15890	3663	5435	8263	13213	14466	14812
782	6041	16162	6466	4299	16410	16287	9561	6301	4443	15866	16045	16253	3439	4763	6975	15898	16197	15784	3442	3555	4411	11535	16113	16079	3723	5501	8340	13078	14214	14933
784	6068	16293	6557	4304	16180	16230	9510	6298	4456	16160	16061	16221	3434	4719	7021	16023	16292	15958	3475	3547	4424	11636	16197	16102	3682	5315	8346	13174	14399	14942
786	6156	16359	6521	4370	16344	16221	9478	6273	4521	15989	16039	16265	3405	4661	7035	16108	16088	16274	3513	3509	4390	11792	16067	16007	3649	5466	8198	13137	14252	14959
788	5921	16266	6511	4252	16119	16391	9268	6297	4436	15995	16080	16428	3471	4740	7064	16165	16257	16004	3475	3610	4526	11893	16189	15997	3742	5411	8181	13251	14410	14977
790	6029	16084	6505	4376	16206	16105	9710	6273	4449	15771	15847	16397	3398	4744	6959	15984	16234	16118	3459	3641	4508	11710	16177	16088	3779	5403	8381	13043	14482	14952
792	6064	16373	6459	4385	16306	16265	9381	6247	4531	15940	16031	16193	3419	4674	6959	15754	16294	16146	3374	3572	4379	11723	16135	15999	3647	5464	8354	13160	14326	14878
794	5971	16347	6614	4290	15987	16174	9377	6193	4433	15921	15944	16401	3432	4689	6983	16030	16210	16139	3458	3556	4470	11731	16207	16060	3690	5377	8498	13245	14404	14818
796	6074	16295	6525	4425	16196	16247	9458	6286	4456	15852	16178	16084	3366	4719	7003	16158	16390	16080	3412	3569	4438	11756	16085	16116	3700	5390	8290	13132	14315	15029
798	6137	16275	6465	4261	16249	16248	9406	6270	4543	16121	16010	16288	3473	4714	7156	16035	16239	16239	3448	3663	4478	11813	16121	16274	3648	5381	8417	13273	14329	14923
800	6078	16194	6534	4257	16126	16027	9401	6339	4459	15887	16077	16326	3414	4831	6927	16244	16477	16407	3457	3656	4451	11753	16131	16002	3699	5428	8330	13129	14358	14897
802	6115	16365	6463	4302	16270	16329	9411	6267	4563	15829	15923	16257	3336	4644	7075	16107	16504	16161	3466	3562	4439	11770	15982	15892	3635	5464	8466	13171	14377	14946
804	6126	16391	6528	4375	16226	16108	9479	6270	4558	16092	15955	16283	3407	4827	7080	16072	16254	16143	3420	3528	4482	11789	16177	16064	3632	5411	8310	13191	14445	14796
806	6044	16148	6511	4275	16274	16181	9520	6347	4449	15737	16023	16278	3493	4768	7109	16120	16373	16228	3402	3557	4388	11904	15972	16061	3781	5519	8411	12976	14390	14855
808	6125	16281	6500	4376	16294	16144	9265	6306	4497	15963	16180	16160	3387	4819	6988	16108	16402	16155	3471	3539	4384	11889	16131	16119	3698	5480	8394	13414	14416	15052
810	6168	16415	6513	4419	16327	16318	9423	6326	4458	16087	16013	16570	3391	4740	7008	16146	16101	16119	3447	3593	4459	11708	16035	16179	3652	5547	8219	13333	14512	14761
812	6149	16288	6583	4305	16136	16153	9452	6325	4459	16027	16111	16313	3376	4762	6989	16225	16270	16155	3492	3622	4478	11777	16075	16097	3705	5501	8314	13167	14330	14881
814	6022	16439	6579	4329	16322	16089	9503	6304	4497	16142	16060	16282	3397	4731	7044	16189	16093	16241	3501	3597	4454	11949	16276	16167	3678	5421	8339	13453	14439	14866
816	6037	16253	6497	4285	16223	16336	9515	6300	4487	15798	16299	16300	3421	4705	6956	16239	16440	16193	3525	3572	4516	11590	16172	15982	3697	5449	8302	13322	14367	14952
818	6050	16322	6555	4321	16243	16220	9470	6365	4477	16024	15879	16439	3497	4785	6972	16117	16465	16037	3461	3555	4422	11762	16448	16261	3699	5556	8300	13296	14407	14852
820	6064	16164	6540	4378	16026	16397	9570	6302	4551	15955	16027	16215	3415	4780	6940	16256	16373	16169	3468	3652	4390	11857	16120	15981	3736	5408	8250	13304	14552	14843
822	6175	16374	6626	4227	16080	16072	9470	6395	4478	16157	16050	16538	3455	4803	7035	16394	16276	16166	3402	3579	4485	12069	16012	15858	3702	5450	8444	13314	14668	14956
824	6033	16442	6433	4374	16067	16142	9503	6303	4507	16105	16118	16194	3333	4793	7109	16291	16290	16275	3549	3644	4422	11755	15980	16200	3669	5425	8495	13260	14391	14985
826	6010	16428	6627	4291	16282	16103	9625	6273	4505	15951	16193	16529	3438	4794	7087	16180	16420	16211	3463	3604	4415	11953	15870	15960	3698	5502	8497	13358	14432	14995
828	6128	16273	6640	4393	16193	16213	9575	6352	4513	16140	16062	16168	3518	4711	7059	16116	16194	15973	3462	3643	4470	11998	15985	16077	3734	5315	8333	13301	14443	14993
830	6030	16129	6613	4334	16278	16161	9464	6313	4458	15923	16088	16297	3351	4757	7063	15884	16093	16059	3511	3621	4441	11795	16001	16028	3750	5461	8379	13231	14502	14997
832	6293	16240	6630	4402	16250	16158	9611	6382	4488	16059	16126	16217	3423	4777	7088	16144	16343	16289	3446	3658	4544	11997	16006	16253	3775	5537	8392	13393	14572	15103
834	6107	16413	6587	4316	16321	16236	9595	6338	4511	15970	16124	16334	3311	4867	7159	15896	16141	16121	3402	3633	4438	11919	16201	16130	3696	5593	8433	13353	14418	15115
836	6111	16488	6600	4317	16028	16294	9752	6390	4519	16023	16072	16191	3437	4826	7006	16277	16321	16251	3484	3721	4494	11900	16153	15931	3707	5530	8398	13484	14635	14803
838	6145	16341	6666	4233	16139	16187	9641	6414	4540	15745	15808	16181	3378	4853	7079	16079	16389	15937	3520	3649	4543	11832	16114	16159	3753	5567	8458	13458	14516	15020
840	6175	16241	6648	4330	16143	16273	9650	6311	4580	16052	16144	16326	3448	4776	7010	16110	16305	16184	3468	3656	4415	12038	16041	16302	3763	5499	8384	13642	14500	15009
842	6062	16161	6707	4377	16350	16210	9581	6335	4563	16053	15927	16135	3395	4788	7056	16118	16361	16203	3524	3585	4595	12063	16143	16297	3761	5402	8484	13275	14648	14962
844	5987	16367	6526	4341	16425	16189	9576	6370	4477	16036	16123	16416	3405	4787	6998	16106	16284	16311	3505	3680	4471	12117	16260	15902	3720	5501	8342	13605	14654	14954
846	6073	16314	6689	4341	16103	16063	9594	6296	4541	15883	16111	16019	3432	4782	7096	15934	16411	16051	3455	3615	4500	11899	16014	16119	3651	5592	8464	13267	14511	14893
848	6043	16525	6598	4307	16095	16120	9483	6365	4373	15932	15970	16525	3523	4800	7070	16229	16562	16252	3549	3602	4450	11926	16157	16031	3779	5543	8420	13318	14602	14908
850	6034	16298	6596	4374	16105	16129	9624	6396	4554	16086	16088	16383	3534	4851	7038	16006	16465	16007	3510	3672	4582	11977	16190	16240	3694	5562	8479	13563	14558	15059
852	6134	16291	6576	4318	15980	16278	9705	6470	4522	15919	16266	16368	3451	4735	7250	16072	16236	16416	3494	3629	4514	12147	16069	15793	3748	5452	8632	13518	14401	15038
854	6143	16331	6728	4431	16261	16196	9571	6439	4496	15837	16057	16180	3398	4914	7206	16121	16234	16186	3542	3546	4542	11994	16221	16015	3843	5475	8527	13354	14767	15080
856	6155	16345	6533	4373	16264	15972	9594	6315	4502	16037	16226	16221	3386	4794	7059	15996	16232	16198	3535	3755	4471	12169	16063	16151	3777	5527	8662	13472	14492	15096
858	6248	16314	6723	4348	16189	16224	9562	6363	4500	15994	16258	16235	3453	4870	7137	16194	16249	16045	3515	3597	4473	11878	15938	16152	3753	5590	8338	13533	14671	15045
860	6170	16301	6663	4399	16022	16236	9703	6437	4508	16060	15868	16200	3564	4808	7113	15960	16292	16079	3526	3669	4427	12146	16139	16148	3817	5579	8667	13534	14301	14834
862	5989	16555	6633	4410	16223	16193	9543	6406	4574	16048	16093	16292	3445	4811	7183	15917	16250	16215	3462	3620	4450	12082	16124	16113	3701	5607	8422	13621	14598	15086
864	6043	16262	6616	4374	16333	16197	9595	6395	4562	16044	16094	16314	3476	4780	7082	16234	16552	16150	3446	3649	4512	12120	15957	16039	3755	5558	8512	13625	14630	15062
866	6219	16339	6634	4325	16049	16121	9591	6379	4499	15853	15884	16233	3452	4677	7087	16063	16291	16150	3510	3641	4614	12034	16206	16112	3747	5547	8507	13451	14925	14993
868	6074	16400	6644	4507	16184	16096	9634	6317	4519	16035	16087	16496
870	6242	16269	6561	4281	16367	16027	9583	6363	4591	16063	15992	16325
872	6104	16473	6699	4374	16262	16181	9506	6362	4521	15746	15881	16250
874	6143	16416	6730	4334	16253	16152	9595	6367	4588	15954	15975	16408
876	6127	16423	6666	4343	16411	16094	9611	6353	4479	15924	16081	16271
878	6208	16202	6630	4387	16349	16249	9600	6440	4507	16162	16034	16155
880	6050	16342	6668	4370	16234	15838	9609	6379	4608	15793	16014	16387
882	6030	16404	6603	4394	16119	16189	9681	6406	4466	16240	16063	16459
884	6171	16362	6663	4366	16346	16264	9708	6408	4590	16090	16144	16506
886	6149	16457	6616	4385	16261	16361	9730	6433	4479	16053	16395	16327
888	6146	16506	6626	4351	16256	16219	9543	6318	4576	15950	16016	16433
890	6238	16433	6606	4420	16253	16358	9775	6482	4485	15895	15915	16595
892	6084	16315	6690	4337	16425	16221	9638	6491	4499	15863	16125	16445
894	6254	16540	6584	4402	16181	16272	9780	6531	4584	16079	15927	16087
896	6129	16355	6690	4373	16246	16260	9813	6440	4602	16108	16129	16500
898	6090	16231	6759	4428	16192	16316	9652	6392	4483	16045	15997	16060
900	6105	16258	6669	4339	16142	16075	9620	6412	4588	16003	16086	16414
902	6145	16314	6604	4483	16183	16070	9576	6407	4550	15965	15881	16319
904	6177	16467	6607	4408	16257	16310	9570	6449	4572	16020	15984	16209
906	6180	15993	6639	4241	16274	16269	9649	6430	4464	16054	16116	16399
908	6280	16550	6668	4428	16307	16187	9731	6359	4593	15842	15785	16323
910	6136	16492	6714	4349	16269	16317	9738	6429	4569	15997	16133	16468
912	6135	16551	6743	4526	16349	16255	9655	6406	4571	16060	15918	16255
914	6123	16389	6668	4371	16176	16416	9594	6499	4597	15931	16138	16300
916	6180	16369	6760	4382	16399	16307	9748	6400	4548	16043	16037	16244
918	6152	16411	6691	4408	16439	16106	9620	6465	4540	15982	15852	16388
920	6168	16474	6761	4441	16204	16138	9607	6478	4496	16209	16081	16246
922	6179	16155	6707	4367	16194	16187	9590	6452	4518	15953	16316	16448
924	6240	16264	6690	4381	16244	16234	9604	6456	4581	16019	16114	16262
926	6129	16429	6646	4419	16220	16397	9786	6483	4509	15884	16156	16461
928	6144	16337	6831	4472	16160	16185	9679	6494	4580	15824	16169	16419
930	6241	16242	6725	4452	16228	16103	9754	6418	4560	15877	15952	16555
932	6093	16364	6671	4463	16248	16167	9856	6460	4631	15918	15820	16453
934	6202	16401	6771	4393	16249	16151	9668	6478	4579	15950	16101	16358
936	6200	16332	6647	4434	16227	15940	9761	6443	4612	16044	15927	16460
938	6221	16295	6770	4516	16243	16283	9756	6434	4595	16231	16261	16392
940	6284	16334	6686	4466	16263	16173	9666	6465	4560	16016	16065	16428
942	6237	16326	6748	4464	16094	16299	9784	6439	4591	15901	16158	16443
944	6185	16393	6699	4427	16167	16209	9756	6385	4638	16035	16236	16497
946	6138	16332	6721	4349	15981	16103	9748	6435	4603	15981	16217	16372
948	6176	16189	6801	4388	16218	16448	9623	6486	4543	16195	16129	16482
950	6204	16506	6631	4450	16237	16242	9876	6528	4550	15842	16076	16345
952	6134	16236	6873	4384	16272	16103	9665	6446	4672	16038	15964	16487
954	6108	16401	6762	4441	16135	16049	9773	6554	4525	15900	16008	16183
956	6154	16491	6732	4418	16317	16246	9823	6467	4605	15971	15981	16424
958	6275	16274	6629	4414	16233	16162	9810	6439	4533	15974	16113	16325
960	6288	16171	6763	4347	16164	16048	9654	6415	4562	15824	16305	16422
962	6201	16275	6660	4401	16116	16009	9763	6525	4672	16046	16019	16485
964	6155	16203	6670	4441	16313	16113	9875	6506	4637	15820	16049	16367
966	6199	16305	6851	4348	16189	16288	9623	6421	4704	16121	16108	16369
968	6220	16244	6734	4367	16163	16090	9857	6513	4642	16055	16234	16354
970	6217	16332	6856	4486	15942	16148	9930	6427	4603	16133	16109	16299
972	6277	16226	6797	4435	16093	16130	9814	6500	4617	16091	16181	16402
974	6287	16326	6782	4481	16317	16088	9781	6472	4588	15955	16083	16354
976	6326	16422	6791	4486	16156	16188	9702	6614	4675	16070	16099	16463
978	6231	16368	6824	4400	16141	16333	9859	6453	4608	16021	16179	16366
980	6207	16549	6739	4375	16302	16258	9689	6362	4586	16064	15955	16183
982	6251	16343	6776	4409	16227	15947	9853	6484	4601	16245	15765	16384
984	6278	16262	6816	4443	16223	16340	10089	6407	4633	16055	16189	16210
986	6303	16225	6823	4407	16230	16269	9978	6490	4583	15957	16240	16338
988	6358	16273	6809	4453	16429	16207	9770	6569	4646	16076	16121	16430
990	6213	16287	6771	4428	16258	16064	9816	6641	4625	16066	16163	16333
992	6119	16490	6813	4464	16083	16300	9681	6582	4599	15967	16163	16621
994	6302	16347	6768	4502	16161	16173	9734	6566	4581	16117	16126	16351
996	6242	16284	6887	4490	16232	16084	9738	6538	4584	15955	16066	16286
998	6195	16377	6787	4402	16347	16175	9810	6483	4627	16095	16185	16366
1000	6244	16309	6806	4400	16045	16272	9827	6615	4711	16091	16377	16460
1002	6164	16425	6736	4412	16260	16415	9805	6507	4588	15969	16072	16462
1004	6271	16635	6772	4431	16246	16361	9759	6468	4623	15924	16172	16455
1006	6334	16336	6689	4351	16168	16221	9925	6341	4593	16008	15887	16577
1008	6326	16313	6838	4383	16339	16115	9729	6519	4683	16012	16302	16301
1010	6245	16402	6752	4497	16412	16349	9944	6456	4671	15935	15902	16292
1012	6305	16271	6834	4423	16323	16219	9817	6397	4603	16044	16159	16405
1014	6204	16447	6755	4430	16106	16079	9796	6510	4726	15950	15943	16323
1016	6265	16537	6790	4454	16162	16137	9750	6536	4706	16178	15946	16348
1018	6201	16562	6841	4409	16109	16166	9634	6583	4696	16050	16195	16337
1020	6245	16221	6798	4454	16067	16287	9878	6498	4589	15909	16214	16396
1022	6116	16490	6736	4431	16177	16429	9938	6612	4679	16140	16096	16408
